1

2

3 The predicted bZIP transcription factor ZIP-1 promotes resistance to intracellular infection in

4 *Caenorhabditis elegans*

5

6

7

8

9

10 Vladimir Lažetić<sup>1</sup>, Fengting Wu<sup>1</sup>, Lianne B. Cohen<sup>1</sup>, Kirthi C. Reddy<sup>1</sup>, Ya-Ting Chang<sup>2</sup>, Spencer

11 S. Gang<sup>1</sup>, Gira Bhabha<sup>2</sup> and Emily R. Troemel<sup>1,\*</sup>

12

13

14

15

16 <sup>1</sup> Division of Biological Sciences, University of California, San Diego, La Jolla, California, United

17 States

18 <sup>2</sup> Department of Cell Biology, New York University School of Medicine, New York, United States

19 \* Corresponding author

20 email: [etroemel@ucsd.edu](mailto:etroemel@ucsd.edu)

21 **Abstract**

22 Defense against intracellular infection has been extensively studied in vertebrate hosts, but less  
23 is known about invertebrate hosts. For example, almost nothing is known about the transcription  
24 factors that induce defense against intracellular infection in the model nematode *Caenorhabditis*  
25 *elegans*. Two types of intracellular pathogens that naturally infect *C. elegans* are the Orsay virus,  
26 which is a positive-sense RNA virus, and microsporidia, which are fungal pathogens. Surprisingly,  
27 these molecularly distinct pathogens induce a common host transcriptional response called the  
28 Intracellular Pathogen Response (IPR). Here we describe *zip-1* as an IPR regulator that functions  
29 downstream of all known IPR activating and regulatory pathways. *zip-1* encodes a putative bZIP  
30 transcription factor of previously unknown function, and we show how *zip-1* controls induction of  
31 a subset of genes upon IPR activation. ZIP-1 protein is expressed in the nuclei of intestinal cells,  
32 and is required in the intestine to upregulate IPR gene expression. Importantly, *zip-1* promotes  
33 resistance to infection by the Orsay virus and by microsporidia in intestinal cells. Altogether, our  
34 results indicate that *zip-1* represents a central hub for all triggers of the IPR, and that this  
35 transcription factor plays a protective role against intracellular pathogen infection in *C. elegans*.

## 36 Introduction

37 Viruses and other obligate intracellular pathogens are responsible for myriad, serious illnesses.  
38 The COVID-19 pandemic, which likely started as a zoonotic disease, has highlighted the critical  
39 need to learn more about anti-viral response pathways in diverse animal hosts (1). RNA viruses,  
40 like the single-stranded, positive-sense RNA virus SARS-CoV-2 that causes COVID-19, are  
41 detected by RIG-I-like receptors (2-4). These receptors detect viral RNA replication products and  
42 trigger transcriptional upregulation of interferon genes to induce anti-viral defense (5). The  
43 nematode *Caenorhabditis elegans* provides a simple model host to understanding responses to  
44 RNA viruses, as a single-stranded, positive-sense RNA virus from Orsay, France infects *C.*  
45 *elegans* in the wild (6). Interestingly, natural variation in *drh-1*, a *C. elegans* gene encoding a RIG-  
46 I-like receptor, was found to underlie natural variation in resistance to the Orsay virus (7). Several  
47 studies indicate that detection of viral RNA by the *drh-1* receptor induces an anti-viral response  
48 through regulating RNA interference (RNAi) (7-9).

49 In addition to regulating RNAi, *drh-1* detection of viral replication products was recently shown to  
50 activate a transcriptional immune/stress response in *C. elegans* called the Intracellular Pathogen  
51 Response (IPR) (10). The IPR was defined as a common transcriptional response to the Orsay  
52 virus and a molecularly distinct natural intracellular pathogen of *C. elegans* called *Nematocida*  
53 *parisii* (11-13). *N. parisii* is a species of Microsporidia, which comprise a phylum of obligate  
54 intracellular fungal pathogens that infect a large range of animal hosts including humans. It is not  
55 known which host receptor detects *N. parisii* infection, but the *drh-1* RIG-I-like receptor appears  
56 to detect viral RNA replication products, and to be critical for viral induction of the IPR (10).  
57 Notably, *C. elegans* does not have clear orthologs of interferon, or the signaling factors that act  
58 downstream of RIG-I-like receptors in mammals, such as the transcription factors NF- $\kappa$ B and  
59 IRF3/7 (14). It is unknown how *drh-1* activates the IPR transcriptional program in *C. elegans*.

60 Several non-infection inputs can also trigger IPR gene expression. For example, blockade of the  
61 proteasome, prolonged heat stress, and mutations in the enzyme Purine Nucleoside  
62 Phosphorylase-1, PNP-1 (which acts in *C. elegans* intestinal epithelial cells to regulate pathogen  
63 response gene expression and pathogen resistance) upregulate the majority of IPR genes (12,  
64 13, 15). [Of note, mutations in human PNP cause T-cell dysfunction, but its role in epithelial cells  
65 is less well-described] (15). In addition to *pnp-1*, analysis of another IPR repressor called *pals*-  
66 22, has provided insight into the regulation and function of IPR genes (12, 13). *pals*-22 belongs  
67 to the *pals* (Protein containing ALS2cr12 signature) gene family, which has one ortholog each in  
68 mouse and human of unknown function, while this family has expanded to 39 members in *C.*

69 *elegans* (12, 16, 17). The biochemical function of *pals* genes is unknown, but they play important  
70 roles in intracellular infection in *C. elegans* (13). Several *pals* genes (e.g. *pals-5*) are upregulated  
71 by virus infection and the other IPR triggers mentioned above. Furthermore, two *pals* genes, *pals-*  
72 *22* and *pals-25*, are opposing regulators of the IPR, acting as an ON/OFF switch for IPR gene  
73 expression as well as resistance to infection (13). Not only do *pals-22/25* control immunity, but  
74 they also control thermotolerance, a phenotype that is dependent on a subset of IPR genes that  
75 encode a newly described, multi-subunit, E3 ubiquitin ligase that promotes proteostasis (13, 18).

76 While Orsay virus infection, *N. parisii* infection, proteotoxic stress, *pnp-1* and *pals-22* mutations  
77 all appear to act independently of each other to trigger IPR gene expression, here we show that  
78 they converge on a common downstream transcription factor. Using two RNAi screens, we find  
79 that the gene encoding a putative basic region-leucine zipper (bZIP) transcription factor called  
80 *zip-1* plays a role in activating expression of the IPR gene *pals-5* by all known IPR triggers.  
81 Furthermore, we use proteasome inhibition as a trigger to show that *zip-1* controls induction of  
82 only a subset of IPR genes. These results demonstrate that there are at least three classes of  
83 IPR genes as defined by whether their induction is dependent on *zip-1* early after proteasome  
84 inhibition, late after proteasome inhibition, or their induction after proteasome inhibition is  
85 independent of *zip-1*. We show that the ZIP-1 protein is expressed in intestinal and epidermal  
86 nuclei, and that ZIP-1 expression in the intestine is required to activate *pals-5* expression.  
87 Importantly, we find that *zip-1* promotes defense against viral as well as against microsporidia  
88 infection in the intestine. Altogether, our results define *zip-1* as a central signaling hub, controlling  
89 induction of IPR gene expression in response to a wide range of triggers, including diverse  
90 intracellular pathogens, other stressors, and genetic regulators. Furthermore, this study describes  
91 ZIP-1 as the first transcription factor shown to promote an inducible defense response against  
92 intracellular infection in *C. elegans*.

93

94

## 95 Results

### 96 Two independent screens for regulators of the IPR identify the predicted transcription 97 factor ZIP-1

98 To determine which transcription factor(s) activates IPR gene expression, we screened an RNAi  
99 library composed of 364 predicted transcription factors to identify RNAi clones that repress  
100 constitutive expression of the PALS-5::GFP translational reporter (*jyEx191*) in a *pals-22(jy3)*  
101 background. In parallel, we also screened this library for RNAi clones that prevent induction of  
102 the *pals-5p::GFP* transcriptional reporter (*jyIs8*) upon prolonged heat stress. In both screens, we  
103 found that *zip-1(RNAi)* led to a substantial decrease in GFP signal (Fig. 1 A and B, Table S1),  
104 suggesting that this putative bZIP-containing transcription factor plays a role in IPR regulation.  
105 We confirmed this *zip-1(RNAi)* phenotype in another *pals-22* loss-of-function allele, *jy1*, showing  
106 that here too, RNAi against *zip-1* repressed the constitutive expression of PALS-5::GFP in *pals-*  
107 *22* mutants (Fig. 1C). To demonstrate that this phenotype is not just restricted to *zip-1(RNAi)*, we  
108 created a full deletion allele of *zip-1* called *jy13* (Fig. S1), and observed decreased expression of  
109 the *pals-5p::GFP* reporter following prolonged heat stress in this putative *zip-1* null mutant (Fig.  
110 1D). These results indicate that *zip-1* is important for regulating expression of two different *pals-*  
111 *5* GFP reporters by two different IPR triggers.

### 112 *zip-1* is required for induction of *pals-5p::GFP* expression by all known IPR triggers

113 We also investigated whether *zip-1* was required for inducing *pals-5p::GFP* expression upon other  
114 IPR triggers. First, we tested whether *zip-1* was required for response to infection with the Orsay  
115 virus. Here we found that while infection of wild-type animals with the Orsay virus induced  
116 expression of the *pals-5p::GFP* reporter, infection of *zip-1(jy13)* mutants caused no GFP induction  
117 (Fig. 2A). Similarly, infection with the microsporidian species *N. parisii* caused GFP expression  
118 throughout intestine in wild-type animals, but little to no GFP expression in *zip-1(jy13)* mutants  
119 (Fig. 2B). Therefore, *zip-1* is required for induction of *pals-5p::GFP* expression after infection by  
120 these two natural intracellular pathogens of the *C. elegans* intestine. We next tested if *zip-1* was  
121 required for constitutive expression of *pals-5p::GFP* in *pnp-1* mutants (15). Here, we also saw a  
122 requirement for *zip-1*, as *zip-1(jy13); pnp-1(jy90)* double mutants had much less *pals-5p::GFP*  
123 signal compared to *pnp-1* single mutants (Fig. 2 C and D). Finally, we investigated whether *zip-1*  
124 is required for induction of *pals-5p::GFP* upon proteasome blockade using the drug bortezomib  
125 (10, 11, 18, 19). Here we also saw that *zip-1* was required for induction of *pals-5p::GFP* across a

126 timecourse of bortezomib treatment (Fig. 2 E and F). Therefore, of the six IPR triggers we tested,  
127 *zip-1* was required for induction of *pals-5p::GFP* by all of them.

128 Because the *jyIs8[pals-5p::gfp]* and *jyEx191[pals-5::gfp]* reporters described above are multi-copy  
129 transgene arrays that could be prone to silencing, we considered the possibility that *zip-1*  
130 repressed GFP expression in the previous experiments through its effects on transgene silencing.  
131 Therefore, we next investigated if *zip-1* inhibited expression from a single-copy transcriptional  
132 reporter, as single-copy transgenes are much less prone to silencing than multi-copy arrays. Here  
133 we used the strain with a single-copy *jySi44[pals-5p::NanoLuc]* transgene insertion, where the  
134 *pals-5* promoter drives expression of the bioluminescent protein nanoluciferase (19). Here we  
135 also found that *zip-1* was required for induction of *pals-5p::NanoLuc* bioluminescence by  
136 proteasome blockade (Fig. 2G), further indicating that *zip-1* regulates gene expression driven by  
137 the *pals-5* promoter.

138 Because the *zip-1* genomic locus contains a non-coding RNA *y75b8a.55* in one of its introns, and  
139 this non-coding RNA is also deleted in the *zip-1(jy13)* deletion strain, we also created a partial  
140 deletion allele of *zip-1* called *jy14* (Fig. S1). This *y75b8a.55* non-coding RNA locus is preserved  
141 in the *jy14* allele, while the region encoding the predicted bZIP domain of *zip-1* is deleted. Here  
142 with intracellular infection and with proteasome blockade treatment, we also found that *pals-*  
143 *5p::GFP* reporter expression was much lower or absent in *zip-1(jy14)* mutants than in wild-type  
144 animals, and indistinguishable from the phenotype of *zip-1(jy13)* mutants (Fig. S2 and S3). In  
145 summary, we found that phenotypes observed after loss of *zip-1* are not allele-specific and that  
146 they cannot be attributed to inactivation of the *y75b8a.55* gene. Altogether, these results indicate  
147 that *zip-1* controls expression of *pals-5* reporters induced by all well-characterized triggers of IPR  
148 gene expression.

#### 149 ***zip-1* is required for early induction of *pals-5* mRNA as well as induction of a subset of** 150 **other IPR genes**

151 We next used qRT-PCR to assess the role of *zip-1* in controlling levels of endogenous *pals-5*  
152 mRNA, as well as mRNA of other IPR genes. Because bortezomib treatment induced the  
153 strongest and most consistent IPR gene expression, we used this trigger to assess the role of *zip-*  
154 *1* in mediating IPR gene induction in subsequent experiments. Here we were surprised that *zip-*  
155 *1(jy13)* mutants had only about a 10-fold reduction in *pals-5* mRNA induction at 4 hours (h) after  
156 bortezomib treatment compared to induction in wild-type animals (Fig. 3A). 4 h is the timepoint at  
157 which *zip-1* mutants were strongly defective for induction of *pals-5p::GFP* and *pals-5p::NanoLuc*

158 expression (Fig. 2E, F, G). Therefore, we considered the possibility that GFP and nanoluciferase  
159 expression observed at 4 h may reflect protein synthesized from mRNA made earlier. To  
160 investigate this possibility, we used qRT-PCR to measure *pals-5* mRNA at 30 minutes (min) after  
161 bortezomib treatment, and here we found that *zip-1* was completely required for the ~300-fold  
162 induction of *pals-5* mRNA at this early timepoint (Fig. 3B). Thus, *zip-1* is completely required for  
163 *pals-5* mRNA induction 30 min after bortezomib treatment, but only partially required for induction  
164 at 4 h after bortezomib treatment.

165 Because *zip-1* appeared to be more important at 4 h for inducing GFP and nanoluciferase  
166 transcriptional reporters than for inducing *pals-5* mRNA by qRT-PCR, we used smFISH as a  
167 separate measure for *pals-5* mRNA levels at this timepoint. Here, as in the GFP reporter studies,  
168 *pals-5* expression was seen in the intestine. Because it is an easily identified location, we  
169 quantified *pals-5* RNA levels in the first intestinal ring, which is comprised of four epithelial cells.  
170 Here we found that *pals-5* mRNA was induced to a lesser degree in *zip-1* mutants treated with  
171 bortezomib compared to wild-type animals (Fig. 3C, Fig. S4).

172 Next, to determine whether *zip-1* mutants are defective in PALS-5 protein production, we raised  
173 polyclonal antibodies against the PALS-5 protein. Using these antibodies for western blots, we  
174 found that PALS-5 protein induction in *zip-1(jy13)* animals at 4 h after bortezomib treatment was  
175 almost undetectable in comparison to the induction in bortezomib-treated wild-type animals (Fig.  
176 3D). Therefore, *zip-1* is required for high levels of PALS-5 protein production after bortezomib  
177 treatment, very likely through its role in regulating induction of *pals-5* mRNA.

178 Having confirmed that *zip-1* is completely required for induction of *pals-5* mRNA at 30 min and  
179 partially required at 4 h, we examined the requirement for *zip-1* in induction of other IPR genes at  
180 these timepoints. We analyzed highly induced IPR genes of unknown function – *F26F2.1*,  
181 *F26F2.3* and *F26F2.4*, as well as components of a cullin-ring ubiquitin ligase complex – *cul-6*,  
182 *skr-3*, *skr-4* and *skr-5*, which mediates thermotolerance as part of the IPR program (18).  
183 Interestingly, *zip-1* was not required at either time point (30 min or 4 h after bortezomib treatment)  
184 for mRNA induction of the majority of genes we analyzed, including *F26F2.1* (Fig. 3 A and B). In  
185 agreement with these results, *zip-1* was not required for *F26F2.1p::GFP* expression after  
186 bortezomib treatment (Fig. S5). Furthermore, *zip-1* was not required for induction of the chitinase-  
187 like gene *chil-27*, which is induced by bortezomib, as well as by the natural oomycete pathogen  
188 *Myzocytiopsis humicola* (13, 20). In contrast, *zip-1* was required at the 4 h timepoint for induction  
189 of *skr-5* RNA levels (Fig 3B). Because the induction of *skr-5* at 30 min was quite low, it was difficult  
190 to assess the role of *zip-1* in regulating this gene at this timepoint. Overall though, these results



191 suggest that there are at least three classes of IPR genes: 1) genes that require *zip-1* for early  
192 but not later induction (“Early *zip-1*-dependent” genes like *pals-5*), 2) genes that require *zip-1* at  
193 the later timepoint (“Late *zip-1*-dependent” genes like *skr-5*), and 3) genes that do not require *zip-*  
194 *1* at either timepoint for their induction (“*zip-1*-independent” genes like *F26F2.1*).

### 195 **RNA sequencing analysis reveals a genome-wide picture of *zip-1*-dependent genes**

196 To obtain a genome-wide picture of the genes controlled by *zip-1*, we next performed RNA  
197 sequencing (RNA-seq) analysis. Here we treated wild-type N2 or *zip-1(jy13)* mutant animals with  
198 either bortezomib or vehicle control for either 30 min or 4 h, then collected RNA and performed  
199 RNA-seq. Based on differential expression analyses, we created lists of genes upregulated in  
200 each genetic background after bortezomib treatment at both analyzed timepoints. At 30 min, we  
201 found that 136 and 215 genes were upregulated in wild-type and *zip-1(jy13)* animals, respectively,  
202 with 72 genes being upregulated in both backgrounds (Fig. 4A, Table S2). Therefore, 64 genes  
203 (i.e. 136 minus 72 genes) were induced only in wild-type animals, indicating that they are *zip-1*-  
204 dependent early upon proteasome blockade. Importantly, *pals-5* was among these genes that  
205 were only upregulated in wild-type animals and not *zip-1* mutants at this timepoint, consistent with  
206 our qRT-PCR analysis (Fig. 3). At 4 h, we identified many more genes that showed differential  
207 expression between bortezomib and control treatments in both genetic backgrounds, with 2923  
208 and 2813 genes upregulated in wild-type and *zip-1(jy13)* mutants, respectively (Fig. 4B, Table  
209 S2). 2035 genes were upregulated in both backgrounds, meaning that 888 genes (2923 minus  
210 2035 genes) were specifically upregulated in wild-type animals. 883 out of 888 genes belong to  
211 the “Late *zip-1*-dependent” category, and include *skr-5*, consistent with our qRT-PCR analysis  
212 (Fig. 3). Notably, five genes (*ZK355.8*, *K02E7.10*, *math-39*, *gst-33* and *F55G1.7*) were induced  
213 only in wild-type animals at both examined timepoints, and thus we classified these genes as  
214 “Completely *zip-1*-dependent”. Therefore, 59 (64 minus 5) genes from the 30 min timepoint belong  
215 to the “Early *zip-1*-dependent” genes category. Of note, consistent with our qRT-PCR and GFP  
216 reporter analysis, the *F26F2.1* gene was upregulated in both genetic backgrounds following  
217 bortezomib treatment, and thus belongs to the “*zip-1*-independent” category.

218 We next examined the correlation between *zip-1*-dependent genes (separately analyzing genes  
219 induced at each timepoint) and gene sets that were previously associated with IPR activation.  
220 Here we found that there is a significant similarity between *zip-1*-dependent genes induced after  
221 30 min bortezomib treatment, and genes upregulated early after Orsay virus infection, *N. parisii*  
222 infection, ectopic expression of Orsay viral RNA1, and genes induced in *pals-22* and *pnp-1*  
223 mutants (Fig. 4C, Table S3). In addition, there is a significant similarity between genes induced



224 at 30 min timepoint and canonical IPR genes. Similarly, there is a significant overlap between *zip-*  
225 *1*-dependent genes induced after 4 h bortezomib treatment and the majority of these IPR-  
226 associated gene-sets. Of note, there was not a significant overlap between *zip-1*-dependent  
227 genes induced after 4 h bortezomib treatment, and genes that are upregulated at the late phases  
228 of viral (96 hpi) and microsporidia infections (40 hpi and 60 hpi). These results suggest that *zip-1*  
229 plays a more important role in the acute transcriptional response to intracellular infection, and  
230 perhaps a lesser role later in infection. Furthermore, our analysis revealed significant similarity  
231 between *zip-1*-upregulated genes and genes that are downregulated by *sta-1*. STA-1 is a STAT-  
232 related transcription factor that acts as a negative regulator of IPR gene expression. (Fig. S6A,  
233 Table S3). We also found a significant overlap between *zip-1*-dependent genes and those induced  
234 by *M. humicola*, a natural oomycete pathogen that infects the epidermis, although *zip-1* was not  
235 required for induction of the chitinase-like gene *chil-27*, which is a common marker for *M. humicola*  
236 response (Fig. S6B, Table S3). Previous studies have shown connections between the IPR and  
237 genes induced either by *M. humicola* infection, or by extract from *M. humicola* as part of the  
238 oomycete recognition response in the epidermis (13, 20, 21).

239 We identified *zip-1*-dependent genes in our analysis here using proteasome blockade by  
240 bortezomib, which has effects on transcription that are unrelated to the IPR. For example,  
241 bortezomib activates the bounceback response that induces expression of proteasome subunits,  
242 and it is controlled by the conserved transcription factor SKN-1/Nrf2 (22). Therefore, we compared  
243 if *zip-1*-dependent genes (from both analyzed timepoints) have significant overlap with *skn-1*-  
244 dependent genes. Here we found no significant similarity between the majority of analyzed  
245 datasets (Fig. S6C, Table S3). These results are consistent with previous IPR RNA-seq studies  
246 showing a distinction between the IPR and the bounceback response, and suggest that *zip-1*  
247 does not play a role in the bounceback response (11, 13).

248 In addition, we found that *zip-1* mRNA itself was strongly upregulated in wild-type animals  
249 following bortezomib treatment, consistent with previous studies (13). Surprisingly however, we  
250 found that *zip-1* mRNA was also upregulated in *zip-1* mutants. This result that was initially  
251 confusing, because the *zip-1* coding sequence is completely deleted in the *zip-1(jy13)* allele that  
252 we used in RNA-seq analysis. Upon closer examination however, we found that *zip-1* sequencing  
253 reads in *zip-1(jy13)* mutant samples aligned to the region upstream of the *zip-1* gene coding  
254 sequence, which contains annotated 5' untranslated regions (UTRs) for several *zip-1* isoforms,  
255 as well as to downstream sequences that contain the *zip-1* 3' UTR (Fig. S7). This finding indicates

256 that *zip-1* is not required to induce its own transcription, but rather a distinct transcription factor is  
257 involved in upregulation of *zip-1* mRNA expression.

258 To obtain insight into other biological processes and cellular structures that may be related to *zip-*  
259 *1*, we performed analysis with the WormCat program, specifically designed for analysis of *C.*  
260 *elegans* genomics data (23). We separately analyzed 64 genes from the early timepoint and 888  
261 genes from the later timepoint that were upregulated in wild-type animals but not *zip-1* mutants.  
262 The only significantly overrepresented category of upregulated genes at 30 min was the stress  
263 response category (Fig. 4D, Table S4). Analysis of the genes upregulated at 4 h revealed a  
264 significant overrepresentation of genes implicated in mRNA function, transcription, nuclear pore,  
265 signaling, development, cytoskeleton, proteolysis and DNA.

266 Finally, we analyzed and classified 80 canonical IPR genes (13) based on their expression levels  
267 in our RNA-seq datasets, to place them into different categories based on their dependence on  
268 *zip-1*. Here we found that 23 IPR genes (including *pals-5*) were upregulated in wild-type animals  
269 but not *zip-1* mutants 30 min after bortezomib treatment, but became upregulated in both genetic  
270 backgrounds at 4 h (Fig. 4E). Therefore, these genes are “Early *zip-1*-dependent” IPR genes.  
271 Notably, 11 *pals* genes belong to this category. Another seven IPR genes (including *skr-5*) were  
272 not upregulated in *zip-1(jy13)* mutants at either timepoint analyzed, but were upregulated in wild  
273 type at 4 h, and we classified these genes as “Late *zip-1*-dependent” IPR genes. Therefore,  
274 overall, 30 IPR genes appeared to be *zip-1*-dependent, when including both timepoints. 42  
275 canonical IPR genes were upregulated in both genetic backgrounds, and we classified them as  
276 “*zip-1*-independent” IPR genes. Because some of these genes were not upregulated at the first  
277 timepoint, we further divided this category of genes into class A that showed upregulation after  
278 30 min bortezomib treatment (including *F26F2. 1*), and class B that showed upregulation only after  
279 4 h of bortezomib treatment. Of note, eight canonical IPR genes did not show significant  
280 upregulation after bortezomib treatment, so we did not classify them in any category. These  
281 include histone genes, which previous studies had shown to be regulated by *pals-22/pals-25* and  
282 *N. parisii* infection (and thus qualify as IPR genes), but not to be induced by bortezomib treatment  
283 (11, 13). In conclusion, our RNA-seq results demonstrate that *zip-1* controls RNA expression of  
284 30 out of 80 IPR genes, and reveal that IPR genes can be placed into three separate classes  
285 based on their regulation by *zip-1*.

286 **ZIP-1 is expressed in the intestine and is required in this tissue to regulate *pals-5* gene**  
287 **expression**

288 To examine where ZIP-1 is expressed, we tagged the *zip-1* endogenous genomic locus with *gfp*  
289 immediately before the stop codon using CRISPR/Cas9-mediated gene editing. Here we found  
290 that ZIP-1::GFP endogenous expression was not detectable in unstressed animals. Because *zip-*  
291 *1* mRNA is induced by bortezomib, and bortezomib blocks protein degradation, we investigated  
292 whether ZIP-1::GFP was visible after bortezomib treatment. Here we found that ZIP-1::GFP  
293 expression was induced, with strongest expression found in intestinal nuclei (Fig. 5A). Nuclear  
294 expression was also identified in the epidermis. Specifically, 98 % (59/60) of animals showed ZIP-  
295 1::GFP expression in intestinal nuclei after 4 h bortezomib treatment, while 88 % (53/60) showed  
296 expression in epidermal nuclei after 4 h bortezomib treatment. In contrast, no GFP signal was  
297 observed in wild-type animals treated with bortezomib, or in *zip-1::gfp* mutants or wild-type  
298 animals treated with DMSO control (60 analyzed animals for each condition).

299 To determine the tissue in which *zip-1* acts to regulate *pals-5* induction, we performed tissue-  
300 specific downregulation of *zip-1* using RNAi, and measured the levels of *pals-5* mRNA following  
301 30 min bortezomib treatment. We used *rde-1* loss-of-function mutation strains, which have a *rde-*  
302 *1* rescuing construct expressed specifically in either the intestine or in the epidermis, which leads  
303 to enrichment of RNAi in these tissues. Here we observed that *zip-1* RNAi in the intestinal-specific  
304 RNAi strain caused a decrease in *pals-5* induction, similar to *zip-1* RNAi in wild-type animals (Fig.  
305 5B). In contrast, *pals-5* induction was less compromised by *zip-1*(RNAi) in the epidermal-specific  
306 RNAi strain. Taken together, our data suggest that *zip-1* is highly expressed in the intestinal nuclei  
307 following bortezomib treatment, and that *zip-1* is important in the intestine for induction of *pals-5*  
308 mRNA.

### 309 ***zip-1* regulates resistance to natural intracellular pathogens**

310 Because increased IPR gene expression is correlated with increased resistance to intracellular  
311 infection (10, 13), we investigated the role of *zip-1* in resistance to intracellular pathogens. First,  
312 we investigated Orsay virus. Here, we infected L4 animals and found that *zip-1* mutants had  
313 higher viral load compared to wild-type animals, as assessed by qRT-PCR (Fig. 6A). Similarly,  
314 we found upon infection of L1 animals and measuring viral load with FISH staining that *zip-1*  
315 mutants had a trend toward higher infection rate than wild-type animals (Fig. 6B). We also  
316 investigated whether *zip-1* might have a greater effect on viral load in a mutant background where  
317 IPR genes are constitutively expressed. Indeed, we found a more pronounced role for *zip-1* after  
318 viral infection of *pnp-1* mutants, which have constitutive expression of IPR genes, including *pals-*  
319 *5* (Fig. 6B) (15). Of note, our qRT-PCR analysis of *pnp-1*(*ky90*) animals showed that elevated  
320 *pals-5* mRNA levels depend on *zip-1*, suggesting that the IPR genes upregulated by *zip-1* promote

321 resistance against viral infection (Fig. S8). Similar to what we observed after bortezomib  
322 treatment, expression of highly induced IPR genes *F26F2.1*, *F26F2.3* and *F26F2.4* in a *pnp-1*  
323 mutant background did not require *zip-1*. This finding suggests that *zip-1*-dependent IPR genes  
324 may play a more important role in Orsay virus resistance than other IPR genes.

325 Next, we examined a role for *zip-1* in resistance to *N. parisii* infection. Here we did not see an  
326 effect of *zip-1* in a wild-type background either at 3 hpi or at 30 hpi (Fig. 6 C and D). However, at  
327 both timepoints, we found that loss of *zip-1* significantly suppressed the increased pathogen  
328 resistance (i.e. lower pathogen load) of *pnp-1* mutants (Fig. 6 C and D). Therefore, these  
329 experiments indicate that wild-type *zip-1* promotes resistance to *N. parisii* infection in a  
330 background where IPR genes are induced prior to infection. Taken together, our results suggest  
331 that *zip-1*-dependent genes have a larger impact on immunity against Orsay virus than  
332 microsporidia. This result could be due to more complex nature of *N. parisii* infection. Because  
333 infections were performed by feeding pathogens to animals, it was possible that differences in  
334 food intake and elimination were responsible for differences seen in pathogen load. Therefore,  
335 we measured accumulation of fluorescent beads in all tested strains and we did not find any  
336 significant differences between *zip-1* mutants and control animals (Fig. S9). In conclusion, the  
337 increased pathogen load in *zip-1* mutants is unlikely to be due to differences in the exposure of  
338 intestinal cells to pathogen in these mutants.

339 Other phenotypes in *pnp-1* mutants include higher sensitivity to heat shock and slightly slower  
340 growth rate (15). We tested if either of these phenotypes are *zip-1*-dependent. First, we found  
341 that *zip-1(jy13)* animals had a similar survival rate after heat shock compared to the control strain  
342 (Fig. S10A). Similarly, we found that loss of *zip-1* in a *pnp-1(jy90)* mutant background did not  
343 significantly suppress the higher lethality observed in *pnp-1(jy90)* single mutants, suggesting that  
344 ZIP-1 does not play a crucial role in thermotolerance regulation. Finally, we analyzed if *zip-1(jy13)*  
345 mutants, which show a wild-type growth rate, can suppress the mild growth delay caused by a  
346 *pnp-1(jy90)* mutation. Here, growth was assayed based on the body length measurements 44 h  
347 after plating synchronized L1 animals, and we found that *zip-1(jy13);pnp-1(jy90)* animals were  
348 still significantly smaller than control animals and *zip-1(jy13)* single mutants (Fig. S10B).  
349 Therefore, *zip-1* does not appear to be important for these non-infection related phenotypes of  
350 *pnp-1* mutants. Instead, it seems that *zip-1* specifically plays a role in regulating immunity-related  
351 IPR genes.

352

353

## 354 Discussion

355 Most studies of antiviral immunity in invertebrates have focused on anti-viral RNAi, and less is  
356 known about transcriptional responses to intracellular infection in either of the two major  
357 invertebrate model systems, *Drosophila melanogaster* or *C. elegans* (24-26). The IPR in *C.*  
358 *elegans* is a common transcriptional response that is induced independently by both virus and  
359 microsporidia infection, as well as by specific physiological perturbations such as proteotoxic  
360 stress (11-13). Previous studies had shown that the STAT-related transcription factor *sta-1* was  
361 a repressor of IPR genes (27), but the activating transcription factor for the IPR was not known.  
362 Here, we show that the previously uncharacterized, predicted bZIP transcription factor ZIP-1  
363 functions downstream of all known IPR triggers to induce a subset of IPR genes (Fig. 7).  
364 Importantly, we show that *zip-1* plays a role in immunity against infection by both the Orsay virus  
365 and microsporidia. Therefore, *zip-1* appears to be the first transcription factor shown to promote  
366 an inducible defense response against intracellular pathogens in *C. elegans*.

367 ZIP-1 adds to the growing list of bZIP transcription factors involved in *C. elegans* immunity. The  
368 bZIP transcription factor family is expanded in *C. elegans* compared to other organisms (28) and  
369 several members of this family have been previously implicated in defense against the  
370 extracellular bacterial pathogens of the intestine. For example, the central pathway in defense  
371 against bacterial pathogens like *Pseudomonas aeruginosa* is the p38 MAPK pathway, which  
372 leads to activation of the ATF7 bZIP transcription factor, as well as the bZIP-related transcription  
373 factor SKN-1 in response to reactive oxygen species generated upon infection (29, 30). The bZIP  
374 proteins ZIP-2 and CEBP-2 control induction of several p38-independent genes induced by *P.*  
375 *aeruginosa*, in response to the *P. aeruginosa* translation-blocking ExotoxinA (31-34). Under  
376 certain infection conditions, ZIP-2 and CEBP-2 act with two other bZIP transcription factors, ZIP-  
377 4 and CEBP-1, to control induction of the Ethanol and Stress Response Element network upon  
378 *P. aeruginosa* infection, likely in response to mitochondrial damage (35). Furthermore, the bZIP  
379 proteins ATFS-1 and ZIP-3 have been shown to play antagonistic roles in activation of  
380 mitochondrial unfolded protein response upon damage caused by *P. aeruginosa* infection (36,  
381 37).

382 In addition to the bZIP transcription factors mentioned above, several other classes of  
383 transcription factors play roles in *C. elegans* defense, including FOXO, GATA, HSF, HLH and  
384 NHR transcription factor family members (38-43). Moreover, several members of *C. elegans* Myc  
385 family of transcription factors have been shown to be the regulators of microsporidia growth and  
386 development (44). What is the logic to having so many transcription factors involved in immunity



387 in *C. elegans*? For comparison, only one bZIP transcription factor, CrebA, has recently been  
388 shown to play a role in *D. melanogaster* tolerance to bacterial pathogens (45). Also, a single STAT  
389 transcription factor – a component of JAK/STAT pathway, has been shown to play a downstream  
390 role in antiviral immunity, although this factor is not thought to be the first responder to viral  
391 infection (46, 47). The majority of studies in *D. melanogaster* indicate that the NF- $\kappa$ B transcription  
392 factors Dif, Dorsal and Relish are the major transcription factors to induce immune genes upon  
393 bacterial and fungal infections, and they also play a role in antiviral immunity (47-49). A large  
394 percentage of immune genes in humans are also controlled by NF- $\kappa$ B transcription factors upon  
395 induction by bacterial infection, and by IRF3/7 upon viral infection, working together with NF- $\kappa$ B  
396 (50-53). Interestingly, NF- $\kappa$ B was lost in the evolutionary lineage that gave rise to *C. elegans*, so  
397 perhaps several other transcription factors fill that gap to induce defense (14). Or perhaps, this  
398 diverse list of immune-related transcription factors is a result of *C. elegans* apparently lacking  
399 professional immune cells like macrophages or hemocytes, which play key roles in mammalian  
400 and *D. melanogaster* defense respectively (54, 55). For this reason, studies in *C. elegans* have  
401 focused on non-professional immune cells like epithelial cells (56-58), which are less well studied  
402 in mammalian research compared to professional immune cells like macrophages. If more  
403 mammalian and *D. melanogaster* studies screened for transcription factors acting in epithelial  
404 cells, the lists might grow longer there as well.

405 Although our study indicates that ZIP-1 plays an important role in defense against intracellular  
406 infection, it almost certainly is not the only transcription factor with such a role. Our qRT-PCR and  
407 RNA-seq analyses demonstrated that many genes induced as part of the IPR do not require ZIP-  
408 1 for their induction, while some require ZIP-1 only for early induction, but not late induction.  
409 Furthermore, *zip-1* mutants were susceptible to viral infection in a wild-type background, but not  
410 more susceptible to microsporidia infection in a wild-type background. Here we only saw a role  
411 for *zip-1* in *pnp-1* mutants, where IPR genes are constitutively expressed. Future studies with  
412 screens for transcription factors that mediate induction of *zip-1*-independent genes should enable  
413 a more complete assessment of the immune response to intracellular infection in *C. elegans*.

414 While *zip-1* itself appears to be transcriptionally induced by infection, we believe that ZIP-1 is the  
415 immediate transcription factor that activates IPR gene expression upon various triggers. *zip-1* is  
416 required for IPR gene induction only 30 min after activation, which is likely too short a time for a  
417 separate transcription factor to activate *zip-1* transcription and translation, which would then  
418 induce IPR gene expression. There is still much to be learned about how various triggers activate  
419 the IPR, although a likely ligand and receptor pair have been identified for the Orsay virus, where

420 viral RNA replication products appear to be detected by the RIG-I-like receptor DRH-1 (10). As  
421 mentioned earlier, *C. elegans* lacks the downstream factors that mediate viral/RIG-I signaling in  
422 mammals, such as IRF3/7 and interferon. Therefore, we propose that ZIP-1 and the IPR may play  
423 an analogous role to IRF3/7 and interferon in *C. elegans* defense against intracellular infection in  
424 intestinal epithelial cells. Further analysis should shed light on how the evolutionarily ancient RIG-  
425 I-like receptor family is rewired in *C. elegans* to enable activation of ZIP-1 and downstream  
426 defense against intracellular infection.

427



## 428 **Materials and methods**

### 429 **Worm maintenance**

430 Worms were grown on Nematode Growth Media (NGM) plates seeded with Streptomycin-  
431 resistant *E. coli* OP50-1 bacteria at 20°C, unless stated otherwise. Strains used in this study are  
432 listed in the Table S5.

### 433 **RNAi screens**

434 RNAi screens were performed using the feeding method in liquid medium. Gravid adults were  
435 bleached following a standard protocol (59), and isolated eggs were incubated in M9 medium  
436 overnight to hatch into starved L1's unless stated otherwise. In particular, for the screen in the  
437 *pals-22(jy3)* mutant background, eggs isolated from bleached gravid adults were put on OP50  
438 seeded NGM plates and incubated at 20°C for 48 h. Subsequently, animals were washed off the  
439 plates with S-basal medium and 150 animals were transferred into wells of 96-well plates.  
440 Overnight cultures of RNAi HT115 bacterial strains were supplemented with 5 mM isopropyl  $\beta$ -d-  
441 1-thiogalactopyranoside (IPTG) and 1 mM carbenicillin, and added to the wells with worms.  
442 Control RNAi experiments were carried out using a vector plasmid pPD129.36 (negative control,  
443 control vector) and *gfp(RNAi)* (positive control). Following incubation at 20°C for 48 h, animals  
444 were collected and analyzed on the COPAS Biosort machine (Union Biometrica). PALS-5::GFP  
445 signal and the time-of-flight (TOF, as a measure of length) were quantified, and average values  
446 for fluorescence/body length were calculated for each animal. In addition, average of all replicates  
447 is shown for RNAi clones that were tested multiple times.

448 For the screen in which chronic heat stress was used to induce the IPR, synchronized populations  
449 of 150 L1 animals carrying the *jyIs8[pals-5p::gfp]* transgene were transferred to S-basal medium  
450 in 96-well plates. The wells were supplemented with overnight RNAi bacterial cultures, as  
451 previously described for RNAi screen in *pals-22(jy3)* mutant background. Animals were incubated  
452 in the shaker at 20°C for 48 h, and then subjected to chronic heat stress at 30°C for 18 h.  
453 Subsequently, *pals-5p::GFP* expression was measured and standardized to the worm length  
454 using TOF measurements on the COPAS Biosort machine.

### 455 **CRISPR/Cas9-mediated deletions of *zip-1* and *pals-5***

456 Deletions of *zip-1* and *pals-5* were carried out using the co-CRISPR method with preassembled  
457 ribonucleoproteins (60, 61). Cas9-NLS protein (27  $\mu$ M final concentration) was ordered from QB3

458 Berkeley; sgRNA components and DNA primers were obtained from Integrated DNA  
459 Technologies (IDT).

460 The following crRNA sequences were used to target *zip-1* gene: acacaggcatctggggaccc (for  
461 generating the *jy13* allele), tcagcttgctgggcgttg (for generating the *jy14* allele),  
462 agcaatttgagccaagctga (for generating both *jy13* and *jy14* alleles). PCR screenings were  
463 performed using the primers 1-4 from the Table S6. Deletion-positive lines were backcrossed  
464 three times to the N2 strain before they were used in experiments. *jy13* allele is an 8241 base  
465 pair long deletion, starting 172 nucleotides upstream of the *zip-1* start codon and ending at the  
466 last nucleotide before the stop codon (C8069). *jy14* allele is a 4108 base pair long deletion,  
467 starting at nucleotide G3962 and ending at the last nucleotide before the stop codon (C8069).

468 The following crRNA sequences were used to target the *pals-5* gene: aaataactcgaagcaattcag and  
469 aaaacgaatagaaaatggga. PCR screenings were performed using primers 10 and 11 from the Table  
470 S6. Deletion-positive lines were backcrossed three times to the N2 strain before they were used  
471 in experiments. *jy133* allele is a 1706 base pair long deletion, starting 128 nucleotides upstream  
472 of the *pals-5* start codon and ending at the 108th nucleotide after the stop codon.

### 473 **Orsay virus infections**

474 Orsay virus isolate was prepared as previously described (11). For *pals-5p::GFP* expression  
475 analysis and FISH staining, L1 animals were exposed to a mixture of OP50-1 bacteria and Orsay  
476 virus for 12 h at 20°C. *pals-5p::GFP* reporter expression was analyzed in animals that were  
477 anesthetized with 10 mM levamisole. For FISH analysis, animals were collected and fixed in 4%  
478 paraformaldehyde. Fixed worms were stained at 46°C overnight using FISH probes conjugated  
479 to the red Cal Fluor 610 fluorophore, targeting Orsay virus RNA1. GFP imaging and FISH analysis  
480 were performed using Zeiss AxioImager M1 compound microscope. For qRT-PCR analyses,  
481 synchronized L4 animals were exposed to a mixture of OP50-1 bacteria and Orsay virus for 24 h  
482 at 20°C. RNA isolation and qRT-PCR analysis were performed as described below.

### 483 **Microsporidia infections**

484 *N. parisii* spores were prepared as previously described (57). Spores were mixed with food and  
485 L1 synchronized animals. Animals were incubated at 25°C for 3 h or 30 h. For *pals-5p::GFP*  
486 expression analysis, animals were anesthetized with 10 µM levamisole and imaged using Zeiss  
487 AxioImager M1 compound microscope. For FISH analysis, animals were collected and fixed in  
488 4% paraformaldehyde. Fixed worms were stained at 46°C overnight using FISH probes

489 conjugated to the red Cal Fluor 610 fluorophore, targeting ribosomal RNA. 3 hpi samples were  
490 analyzed using Zeiss Axiolmager M1 compound microscope; 30 hpi samples were imaged using  
491 ImageXpress automated imaging system Nano imager (Molecular Devices, LLC), and  
492 fluorescence levels were analyzed using FIJI program.

#### 493 **Bortezomib treatments**

494 Proteasome inhibition was performed using bortezomib (Selleckchem) as previously described  
495 (18, 19). Synchronized L1 animals were plated on 10 cm (for RNA extraction) or 6 cm NGM plates  
496 (for phenotypic analyses and transgene expression measurements), and grown for 44 h or 48 h  
497 at 20°C. 10 mM stock solution of bortezomib in DMSO was added to reach a final concentration  
498 of 20 µM per plate. The same volume of DMSO was added to the control plates. Plates were dried  
499 and worms incubated for 30 minutes, 4, 21 or 25 hours at 20°C. Imaging was performed using  
500 Zeiss Axiolmager M1 compound microscope or ImageXpress automated imaging system Nano  
501 imager (Molecular Devices, LLC), and analyzed using FIJI program. For RNA extraction, animals  
502 were washed off the plates using M9, washed with M9 and collected in TRI reagent (Molecular  
503 Research Center, Inc.).

#### 504 **Fluorescence measurements**

505 Fluorescence measurements shown in Fig. 1A and B and Fig. 2D were performed using the  
506 COPAS Biosort machine (Union Biometrica). The fluorescent signal was normalized to TOF, as  
507 a proxy for worm length. Fluorescence measurements shown in Fig. 2F, Fig. 6D and Fig. S9 were  
508 performed by imaging animals using ImageXpress automated imaging system Nano imager  
509 (Molecular Devices, LLC), followed by image analysis in FIJI. Mean gray value (as a ratio of  
510 integrated density and analyzed area) was measured for each animal and normalized to the  
511 background fluorescence.

#### 512 **Bioluminescence measurements**

513 Synchronized L1 animals were grown at 20°C for 44 h and then treated with bortezomib or DMSO  
514 for 4 h. Sample preparation and nanoluciferase bioluminescence measurements were performed  
515 as previously described (19). In brief, animals were collected and disrupted using silicon carbide  
516 beads in lysis buffer (50 mM HEPES pH 7.4, 1 mM EGTA, 1 mM MgCl<sub>2</sub>, 100 mM KCl, 10%  
517 glycerol, 0.05% NP40, 0.5 mM DTT, protease inhibitor cOmplete Cat from Sigma). The lysates  
518 were centrifuged and the supernatants were collected and stored at -80°C until bioluminescence  
519 was measured. Nano-Glo Luciferase Assay System reagent (Promega) was added to the worm

520 lysate supernatant before analysis, and incubated at room temperature for 10 minutes. Analysis  
521 was performed on a NOVOstar plate reader. The results were normalized to blank controls.

## 522 **smFISH analysis**

523 smFISH experiments were performed as previously described (12). In brief, L4 animals were  
524 treated with bortezomib or DMSO for 4 h at 20°C. Animals were washed off the plates, fixed in  
525 4% paraformaldehyde in phosphate-buffered saline + 0.1% Tween 20 (PBST) at room  
526 temperature for 30 min, and incubated in 70% ethanol overnight at 4°C. Staining was performed  
527 with 1 µM Cal Fluor 610 conjugated *pals-5* smFISH probes (Biosearch Technologies) in smFISH  
528 hybridization buffer (10% formamide, 2X SSC, 10% dextran sulfate, 2 mM vanadyl ribonucleoside  
529 complex, 0.02% RNase free BSA, 50 µg *E. coli* tRNA) at 30°C in the dark overnight. Samples  
530 were incubated in the wash buffer (10% formamide, 2X SSC) at 30°C in the dark for 30 min.  
531 Vectashield + DAPI was added to each sample, and stained worms were transferred to  
532 microscope slides and covered with glass coverslips. Z-stacks of the body region containing  
533 anterior part of the intestine was performed using Zeiss AxioImager M1 compound microscope  
534 with a 63X oil immersion objective. Image processing was performed using FIJI. smFISH spot  
535 quantification was performed using StarSearch program  
536 (<http://rajlab.seas.upenn.edu/StarSearch/launch.html>). When selecting the region of interest, the  
537 anterior boundary of the first four intestinal cells was determined based on the prominent border  
538 between pharynx and intestine, which is visible in the DIC channel. The posterior boundary was  
539 set at the middle distance between DAPI-stained nuclei of the first and the second intestinal rings.

## 540 **PALS-5 expression and anti-PALS-5 antibody synthesis**

541 A *pals-5* cDNA with N-terminal sequence (5'-tatgcatcaccaccatcaccatgaaaatctgtattttcag-3') and C-  
542 terminal sequence (5'-gagagaccggccggccgatccggctgctaa-3') was synthesized as a gBlock  
543 (Genewiz) and cloned into Bsal-HFv2 digested into a custom vector derived from pET21a. The  
544 resulting plasmid (pBEL2159), which includes an N-terminal His-TEV-tag, was transformed into  
545 Rosetta (DE3) cells (Novagen) for protein expression. For expression, LB with carbenicillin/  
546 chloramphenicol was inoculated with Rosetta (DE3)/pBEL2159 and grown at 37°C with shaking  
547 at 200rpm. The overnight culture was diluted 1:50 in LB+carbenicillin/chloramphenicol and then  
548 induced by adding IPTG to a final concentration of 1mM at 16°C, and allowed to shake overnight.  
549 Cells were harvested by centrifugation and resuspended in lysis buffer (50mM Tris pH8, 300mM  
550 NaCl, 10mM Imidazole, 10% Glycerol, 1mM phenylmethylsulfonyl fluoride (PMSF)). Cells were  
551 lysed using the Emulsiflex-C3 cell disruptor (Avestin) and then centrifuged at 4°C, 12,000g to

552 pellet cell debris. The pellet, containing a large amount of insoluble PALS-5, was resuspended in  
553 urea lysis buffer (100 mM NaH<sub>2</sub>PO<sub>4</sub>/10 mM Tris base, 10 mM Imidazole, 8 M Urea [titrated to  
554 pH8 by NaOH]). The solubilized pellet was centrifuged at 4000g, and the supernatant collected.  
555 PALS-5 from the resulting supernatant was passed twice through NiNTA resin (Cytiva  
556 #17531802), which was subsequently washed with urea wash buffer (100 mM NaH<sub>2</sub>PO<sub>4</sub>/10 mM  
557 Tris base, 40 mM Imidazole, 8 M Urea [titrated to pH8 with NaOH]), and the bound proteins were  
558 then eluted in urea elution buffer (100 mM NaH<sub>2</sub>PO<sub>4</sub>/10 mM Tris base, 300 mM Imidazole, 8 M  
559 Urea [titrated to pH8 by NaOH]). Fractions containing PALS-5 were pooled, concentrated and  
560 dialyzed into dialysis buffer (PBS (137mM NaCl, 2.7mM KCl, 1.5mM KH<sub>2</sub>PO<sub>4</sub>, 8.1mM  
561 Na<sub>2</sub>HPO<sub>4</sub>), 3.9M Urea [titrated to pH8 by NaOH]) overnight at room temperature. The following  
562 day, the sample was dialyzed once again in fresh dialysis buffer for 3hr at room temperature. The  
563 dialyzed sample was supplemented with 10% glycerol, flash frozen in liquid nitrogen for storage,  
564 and submitted to ProSci Inc. for custom antibody production (Poway, CA). Rabbits were initially  
565 immunized with 200 µg full-length His::TEV tagged PALS-5 antigen in Freund's Complete  
566 Adjuvant. Rabbits were then subsequently boosted with four separate immunizations of 100 µg  
567 antigen in Freund's Incomplete Adjuvant over a 16-week period. Approximately 25 ml of serum  
568 was collected and PALS-5 polyclonal antibody was purified with an immuno-affinity  
569 chromatography column by cross-linking PALS-5 to cyanogen bromide (CNBr)-activated  
570 Sepharose 4B gel. Antibody was eluted from the affinity column in 100 mM glycine buffer pH 2.5,  
571 precipitated with polyethylene glycol (PEG), and concentrated in PBS pH 7.4 + 0.02% sodium  
572 azide. Antibody concentration was determined by ELISA and used in western blot analysis  
573 described below.

#### 574 **Western blot analysis**

575 3000 L4 animals were treated with bortezomib or DMSO for 4 h at 20°C, and then collected and  
576 washed with M9. 20 µl of 6x loading buffer (375 mM Tris-HCl pH 6.8, 600 mM DTT, 12% SDS,  
577 0.06% bromophenol blue, and 60% glycerol) were added to the final sample volume of 100 µl.  
578 Samples were boiled at 100°C for 10 min and stored at -30°C. Proteins were separated on a 10%  
579 sodium dodecyl sulfate–polyacrylamide gel electrophoresis precast gel (Bio-Rad), and transferred  
580 onto polyvinylidene difluoride (PVDF) membrane. 5% nonfat dry milk in PBST was used to block  
581 for nonspecific binding for 2 h at room temperature. The membranes were incubated with primary  
582 antibodies overnight at 4°C (rabbit anti-PALS-5 diluted 1:1,000 and mouse anti-tubulin diluted  
583 1:3000 in blocking buffer). Next, the membranes were washed five times in PBST, and then  
584 incubated in horseradish peroxidase-conjugated secondary antibodies at room temperature for 2

585 h (goat anti-mouse and anti-rabbit diluted 1:10,000 in blocking buffer). After five washes in PBST,  
586 the membranes were treated with enhanced chemiluminescence (ECL) reagent (Amersham) for  
587 5 min, and imaged using a Chemidoc XRS+ with Image Lab software (Bio-Rad).

### 588 **RNA isolation**

589 Total RNA isolation was performed as previously described (15). Animals were washed off plates  
590 using M9, then washed with M9 and collected in TRI reagent (Molecular Research Center, Inc.).  
591 RNA was isolated using BCP phase separation reagent, followed by isopropanol and ethanol  
592 washes. For RNA seq analysis, samples were additionally purified using RNeasy Mini kit from  
593 Qiagen.

### 594 **qRT-PCR analyses**

595 qRT-PCR analysis was performed as previously described (15). In brief, cDNA was synthesized  
596 from total RNA using iScript cDNA synthesis kit (Bio-Rad). qPCR was performed using iQ SYBR  
597 Green Supermix (Bio-Rad) with the CFX Connect Real-Time PCR Detection System (Bio-Rad).  
598 At least three independent experimental replicates were performed for each qRT-PCR analysis.  
599 Each sample was analyzed in technical duplicates. All values were normalized to expression of  
600 *snb-1* control gene, which does not change expression upon IPR activation. The PffafI method  
601 was used for data quantification (62). The sequences of the primers used in all qRT-PCR  
602 experiments are given in the Table S6 (primers 12-33).

### 603 **RNA seq analysis**

604 cDNA library preparation and single-end sequencing was performed at the Institute for Genomic  
605 Medicine at the University of California, San Diego. Reads were mapped to *C. elegans* WS235  
606 genome using Rsubread in RStudio (Table S7). Differential expression analyses were performed  
607 using limma-voom function in Galaxy platform (<https://usegalaxy.org/>). Genes with counts number  
608 lower than 0.5 counts per million (CPM) for 30 min timepoint samples and 1 CPM for 4 h timepoint  
609 samples were filtered out. Quality weights were applied in analysis of 30 min timepoint.  
610 Differentially expressed genes had adjusted *p*-value lower than 0.05. Visualization of the mapped  
611 reads shown in the Fig. S7 was performed using Integrative Genomics Viewer (Broad Institute)  
612 (63).

### 613 **Analysis of enriched gene categories in *zip-1*-dependent gene datasets**

614 Annotation and visualization of genes upregulated in wild-type but not in *zip-1(jy13)* background  
615 was performed using WormCat online tool (<http://www.wormcat.com/>) (23).



## 616 **Comparisons of differentially expressed genes from different datasets**

617 An R studio package GeneOverlap was used for RNA-seq datasets comparative analyses.  
618 Differentially expressed genes from RNA-seq analyses from this study were compared with  
619 relevant previously published datasets (11, 13, 15, 21, 22, 27, 64-66). Statistical similarity  
620 between datasets was determined using Fisher's exact test. The odds ratios, Jaccard indexes  
621 and  $p$ -values were calculated. Total number of genes was set to 46902. Data are represented in  
622 the contingency tables in which odds ratio and Jaccard index values are shown in the heat map  
623 format, whereas  $p$ -values are indicated numerically.

## 624 **CRISPR/Cas9-mediated tagging of *zip-1***

625 A long, partially single-stranded DNA donor CRISPR-Cas9 method was employed to  
626 endogenously tag the *zip-1* locus (67). A single sgRNA (agcaatttgagccaagctga) was used to  
627 preassemble ribonucleoprotein with Cas9 (IDT). Repair templates that contain *gfp*, *sbp* and  
628 *3xFlag* tags were amplified from plasmid pET386 using primers 5-8 from Table S6. Injection  
629 quality was monitored by co-injecting animals with pRF4 plasmid (*rol-6(su1006)* marker). PCR  
630 screening of GFP insertion was performed using primers 3, 4 and 9 from the Table S6. Insertion-  
631 positive line was backcrossed three times to the N2 strain before it was used in experiments.

## 632 **Tissue-specific RNAi analysis**

633 Tissue-specific RNAi analysis was performed using the feeding method. *E. coli* OP50-1 strain  
634 was modified to enable *zip-1* RNAi or control RNAi (pPD129.36 vector plasmid). Bacterial  
635 overnight cultures were plated on NGM plates supplemented with 2.2 mM IPTG and 1 mM  
636 carbenicillin, and incubated at room temperature for 3 or 4 days. 3000 synchronized L1 animals  
637 were transferred to prepared plates and grown at 20°C for 48 h. Animals were then treated with  
638 bortezomib or DMSO as described earlier. VP303 strain was used for intestinal RNAi; NR222  
639 strain was used for epidermal RNAi.

## 640 **Bead feeding assay**

641 2000 synchronized L1 worms were mixed with 6  $\mu$ l fluorescent beads (Fluoresbrite Polychromatic  
642 Red Microspheres, Polysciences Inc.), 25  $\mu$ l 10X concentrated OP50 *E. coli*, 500,000 *N. parisii*  
643 spores and M9 (total volume 300  $\mu$ l). This mixture was then plated on 6 cm NGM plates, allowed  
644 to dry for 5 min and then incubated at 25°C. After 5 min, plates were shifted to ice, washed with  
645 ice-cold PBST and fixed in 4% paraformaldehyde. Animals were imaged using ImageXpress



646 automated imaging system Nano imager (Molecular Devices, LLC). Fluorescence was analyzed  
647 in FIJI program.

#### 648 **Thermotolerance assay**

649 Animals were grown on NGM plates at 20°C until L4 stage. L4 animals were transferred to new  
650 plates and exposed to heat shock at 37.5°C for 2 h. Recovery was performed at room temperature  
651 for 1 h, followed by 24 h incubation at 20°C. After this time, animals were scored for viability based  
652 on their ability to move. Three plates with 30 animals per plate were analyzed for each strain.  
653 Three experimental replicates were performed.

#### 654 **Body length measurements**

655 Synchronized L1 animals were plated on NGM plates and allowed to grow at 20°C for 44 h.  
656 Animals were washed off the plates with M9 and transferred to 96 well plates, where they were  
657 anesthetized with 10 µM levamisole. Animals were imaged using ImageXpress automated  
658 imaging system Nano imager (Molecular Devices, LLC). Length of each animal was measured  
659 using FIJI program. 50 animals were analyzed for each strain, in each of three experimental  
660 replicates.

661

662 **Figures and figure legends**

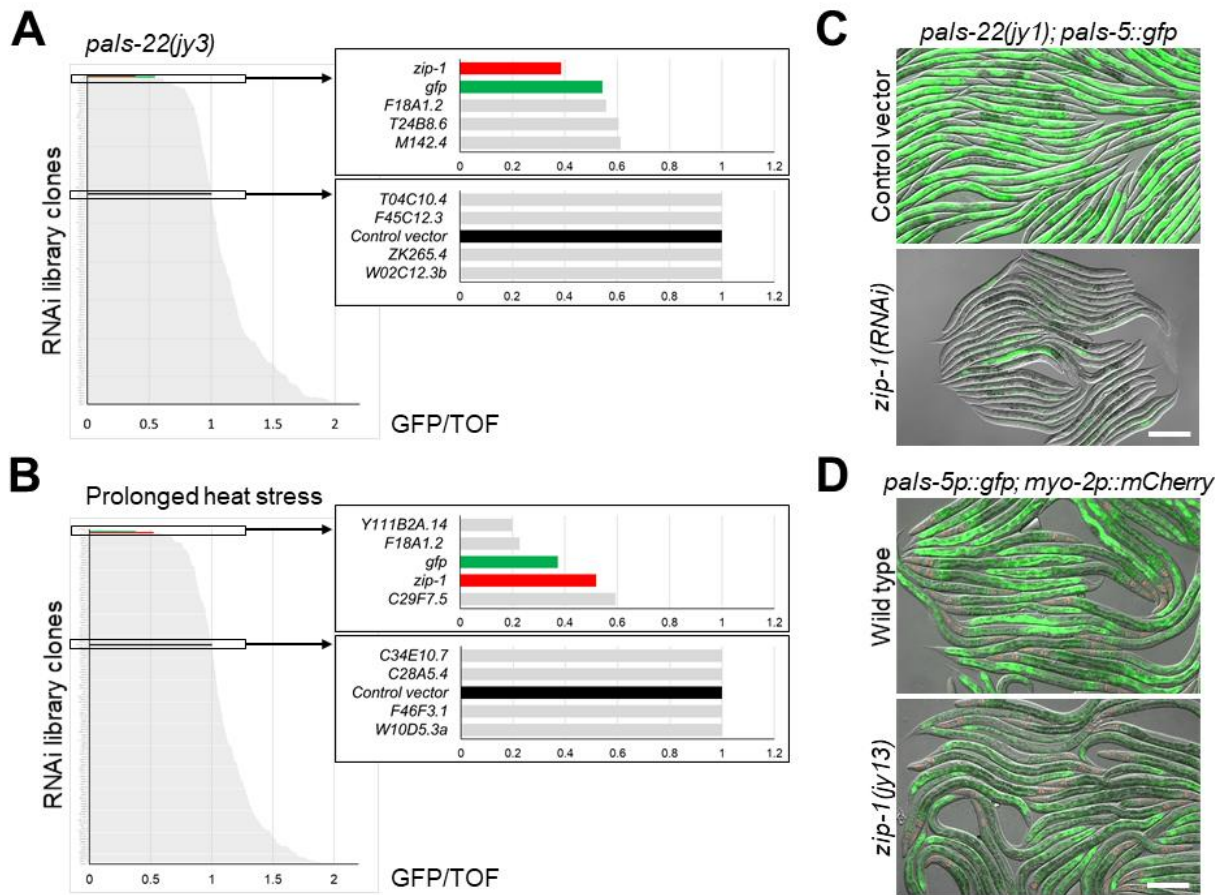

663

664 **Fig 1. *zip-1* is required for induction of *pals-5* GFP reporters by *pals-22* RNAi and by**  
 665 **prolonged heat stress.** (A, B) Graphical overview of RNAi screen results in the *pals-22(jy3);*  
 666 *gyEx191[pals-5::gfp]* background (A) and following chronic heat stress (B). GFP intensity was  
 667 normalized to the length of worms (TOF) and it is indicated on the x-axis; different RNAi clones  
 668 are listed on the y-axis. Boxes on the right represent enlarged sections of the graph containing  
 669 *zip-1(RNAi)* results and relevant controls. (C) *pals-22(jy1); gyEx191[pals-5::gfp]* animals show  
 670 constitutive expression of the PALS-5::GFP reporter when grown on control vector RNAi plates  
 671 (upper image) but not on *zip-1* RNAi plates (lower image). (D) Expression of GFP from the  
 672 *gyIs8[pals-5p::gfp, myo-2p::mCherry]* reporter is decreased in *zip-1(jy13)* animals following  
 673 prolonged heat stress (lower image), in comparison to wild-type animals (upper image). (C, D)  
 674 Fluorescent and DIC images were merged. Scale bars = 200  $\mu$ m. *myo-2p::mCherry* is expressed  
 675 in the pharynx and is a marker for the presence of the *gyIs8* transgene.

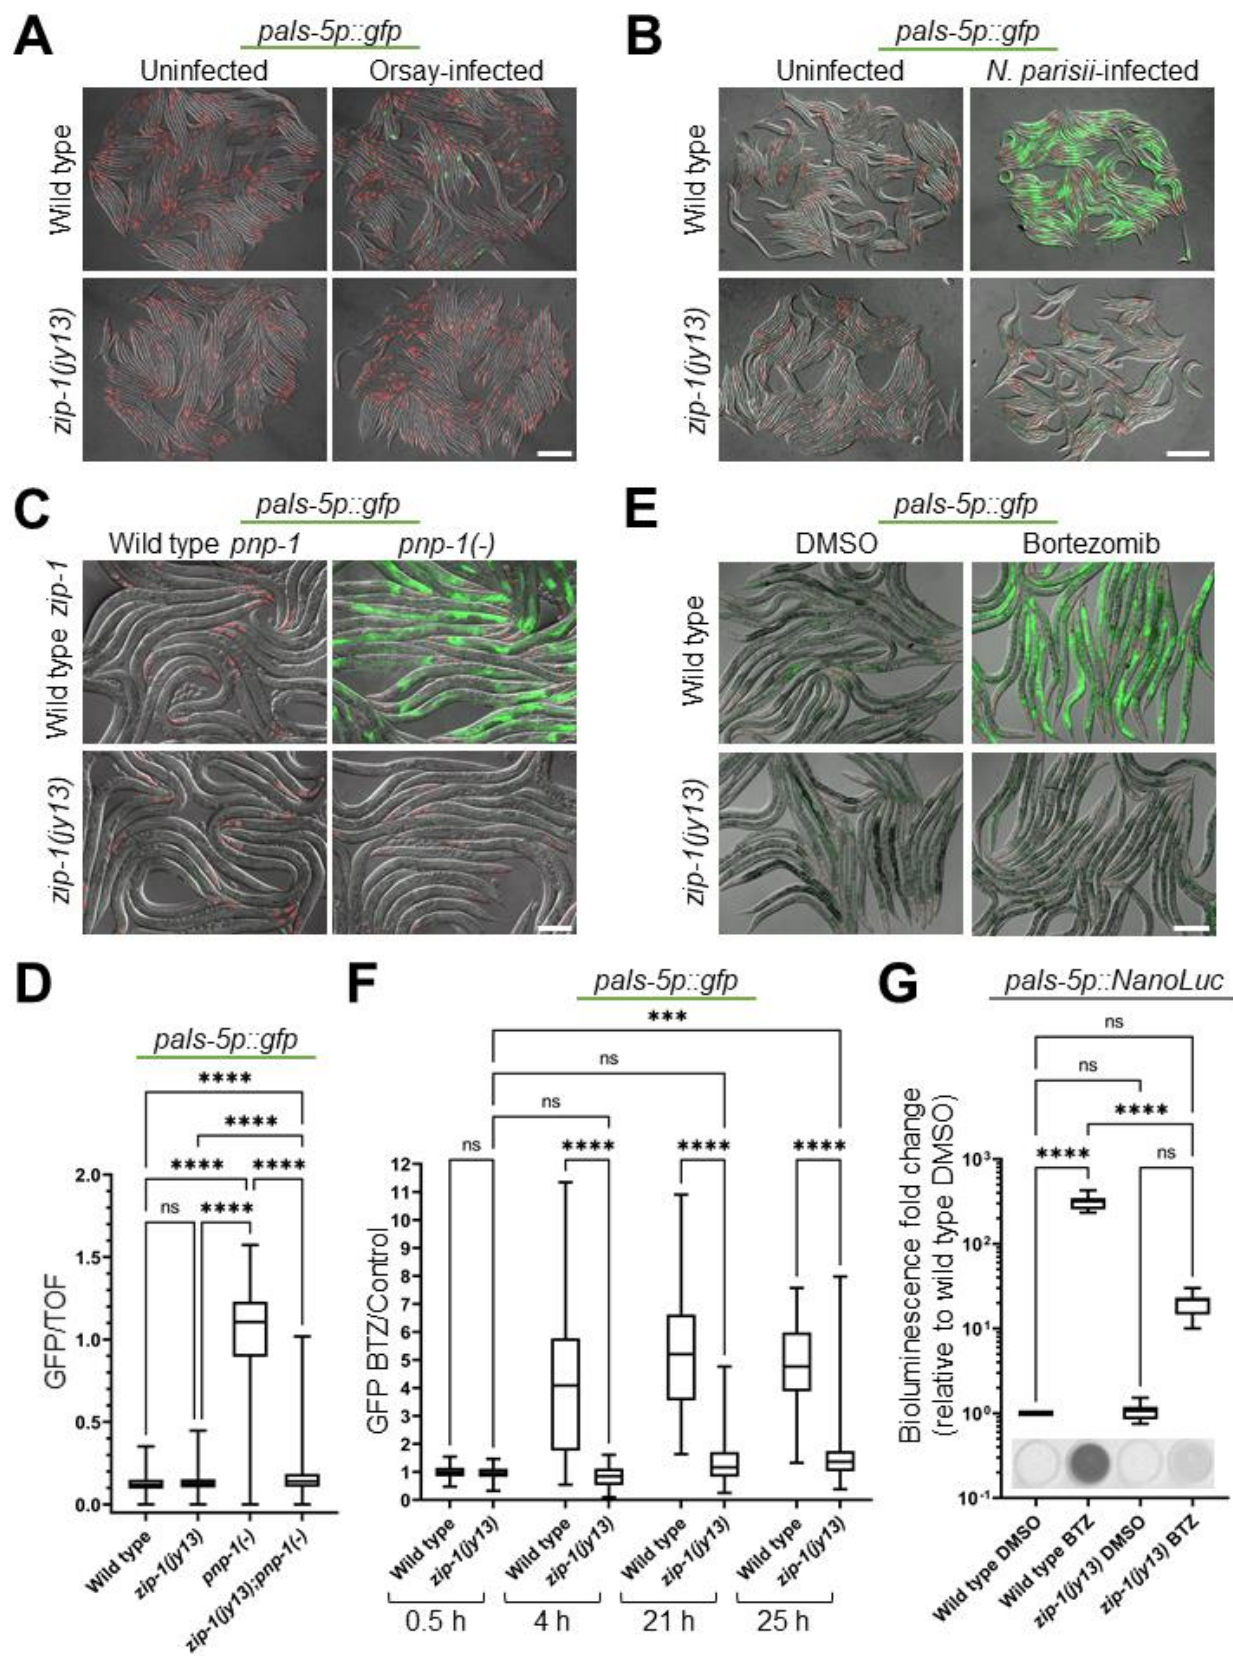

676

677 **Fig 2. *zip-1* is required for induction of *pals-5p::GFP* expression by intracellular infections,**  
678 ***pnp-1* downregulation and proteasome blockade.** (A, B) Intracellular infection by Orsay virus  
679 (A) and by microsporidia *N. parisii* (B) leads to *jyls8[pals-5p::gfp]* expression in wild-type animals,  
680 but not in *zip-1(jy13)* mutants. (C) *pnp-1(jy90)* mutants show constitutive expression of the *pals-*  
681 *5p::GFP* reporter, which is suppressed in *zip-1(jy13); pnp-1(jy90)* double mutants. (D) Box-and-  
682 whisker plot of *pals-5p::GFP* expression normalized to length of animals (TOF). Increased GFP  
683 signal in *pnp-1(jy90)* mutants is significantly reduced in *zip-1(jy13); pnp-1(jy90)* double mutants.  
684 Three experimental replicates with 400 animals per replicate were analyzed for each strain. (E)  
685 Bortezomib treatment induces expression of *pals-5p::gfp* in a wild-type background, but not in *zip-*  
686 *1(jy13)* mutants. (A-C, E) Fluorescent and DIC images were merged. Scale bars = 200  $\mu$ m. *myo-*  
687 *2p::mCherry* is expressed in the pharynx and is a marker for the presence of the *jyls8* transgene.  
688 (F) Timecourse analysis of *pals-5p::GFP* expression in control and *zip-1(jy13)* strains following  
689 bortezomib treatment. GFP signal normalized to worm area is shown as a fluorescence intensity  
690 ratio between bortezomib- and DMSO-treated samples (y axis). Three experimental replicates  
691 with 30 animals per replicate were analyzed; average value was used for DMSO controls. Allele  
692 names and timepoints of analysis are indicated on the x axis. (G) Expression of *pals-5p::NanoLuc*  
693 reporter is significantly lower in *zip-1(jy13)* animals than in the wild-type control strain, following  
694 bortezomib treatment. Three experimental replicates consisting of three biological replicates were  
695 analyzed for each strain and treatment. Results were normalized to background luminescence  
696 and to average value of three biological replicates for wild type treated with DMSO. Normalized  
697 Relative Fluorescent Units (RLU) are shown on the y axis. Images of bioluminescent signal in  
698 representative analyzed wells are shown on the bottom of the graph. (D, F, G) In box-and-whisker  
699 plots, each box represents 50% of the data closest to the median value (line in the box). Whiskers  
700 span the values outside of the box. A Kruskal-Wallis test (D, F) or ordinary one-way ANOVA test  
701 (G) were used to calculate *p*-values; *p* < 0.0001 is indicated with four asterisks; *p* < 0.001 is  
702 indicated with three asterisks; ns indicates nonsignificant difference (*p* > 0.05). (A-G) Experiments  
703 were performed at 20°C.

704



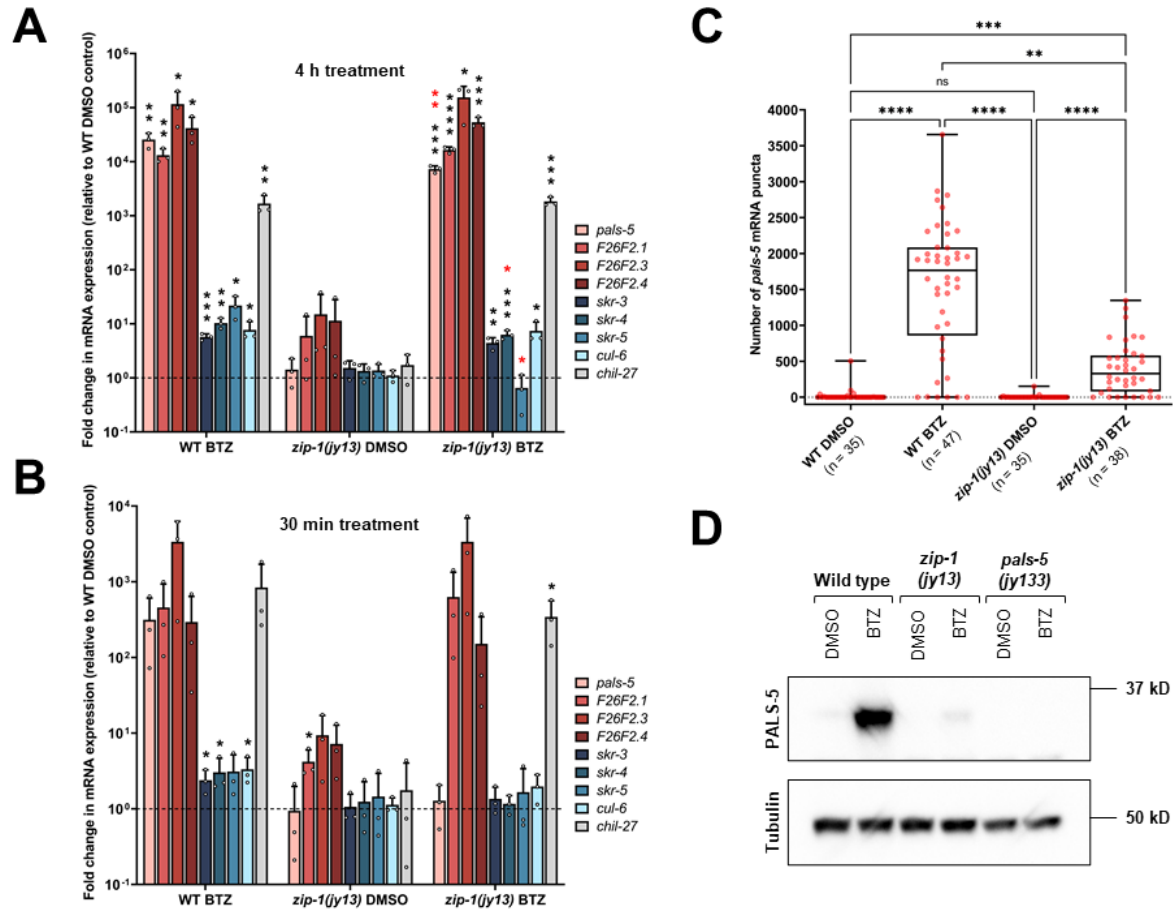

705

706 **Fig 3. *zip-1* regulates the early phase of *pals-5* transcription following bortezomib**  
 707 **treatment, and controls some IPR gene expression.** (A, B) qRT-PCR measurements of  
 708 selected IPR genes and *chil-27* at 4 h timepoint (A) and 30 min timepoint (B) of bortezomib (BTZ)  
 709 or DMSO treatments. The results are shown as the fold change in gene expression relative to  
 710 wild-type DMSO diluent control. Three independent experimental replicates were analyzed; the  
 711 values for each replicate are indicated with circles. Error bars represent standard deviations. A  
 712 one-tailed t-test was used to calculate *p*-values; black asterisks represent significant difference  
 713 between the labeled sample and the wild-type DMSO control; red asterisks represent significant  
 714 difference between Wild-type (WT) N2 and *zip-1(jy13)* bortezomib treated samples; *p* < 0.0001 is  
 715 indicated with four asterisks; *p* < 0.001 is indicated with three asterisks; *p* < 0.01 is indicated with  
 716 two asterisks; *p*-values between 0.01 and 0.05 are indicated with a single asterisk; *p*-values higher  
 717 than 0.05 are not labeled. (C) smFISH quantification of number of *pals-5* mRNA transcripts in the  
 718 first four intestinal cells. Three experimental replicates were performed and at least 33 animals  
 719 were analyzed for each sample (at least five animals were analyzed per sample per replicate), 4  
 720 h after bortezomib or DMSO control treatment. In box-and-whisker plots, each box represents

721 50% of the data closest to the median value (line in the box), whereas whiskers span the values  
722 outside of the box. A Kruskal-Wallis test was used to calculate  $p$ -values;  $p < 0.0001$  is indicated  
723 with four asterisks;  $p < 0.001$  is indicated with three asterisks;  $p < 0.01$  is indicated with two  
724 asterisks; ns indicates nonsignificant difference ( $p > 0.05$ ). (D) Western blot analysis of PALS-5  
725 expression in wild-type, *zip-1(jy13)* and *pals-5(jy133)* animals. *pals-5(jy133)* is a complete  
726 deletion of the *pals-5* gene and was used as a negative control. Animals were treated with  
727 bortezomib or DMSO control for 4 h. PALS-5 was detected using anti-PALS-5 antibody, whereas  
728 anti-tubulin antibody was used as a loading control. Predicted sizes are 35.4 kD for PALS-5 and  
729 around 50 kD for different members of tubulin family.

730

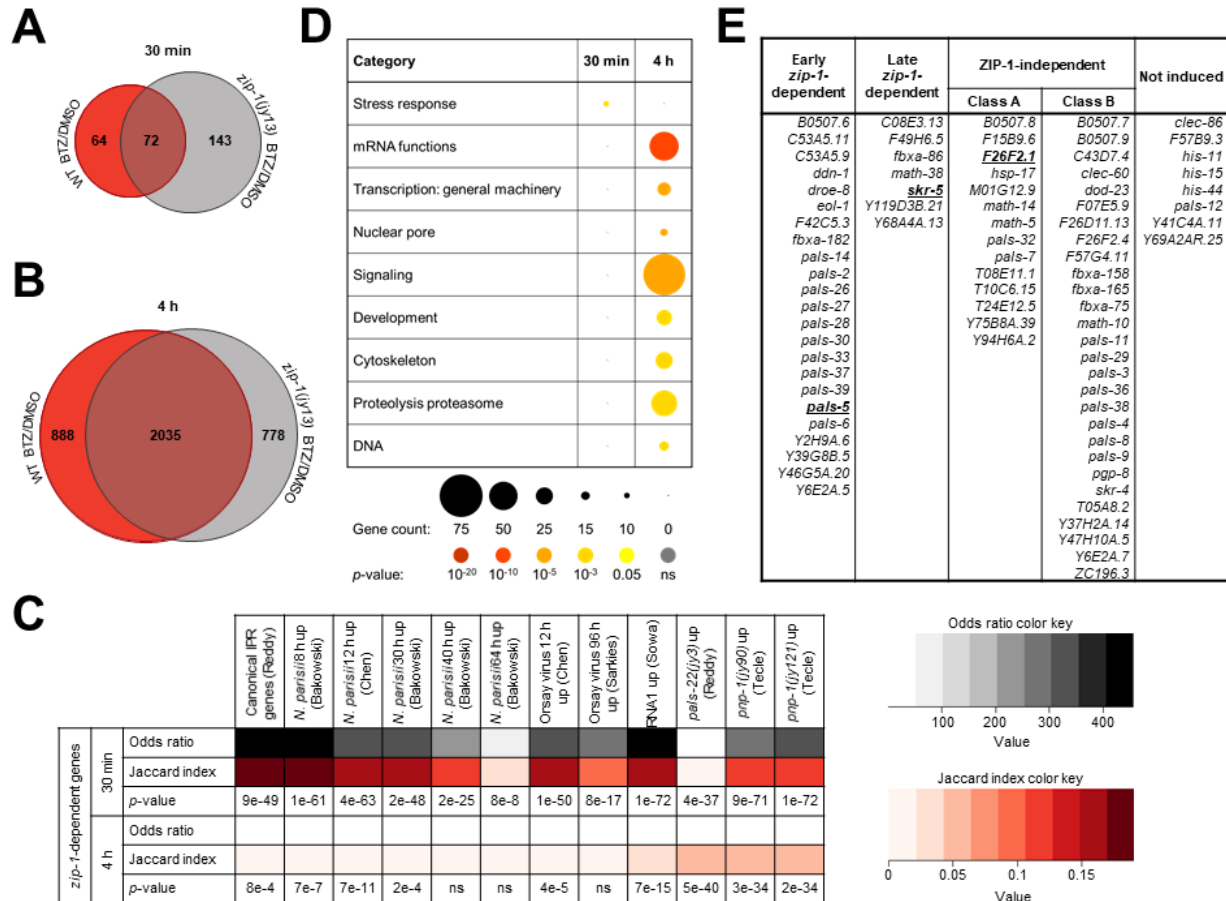

731

732 **Fig. 4. Defining zip-1-dependent IPR genes.** (A, B) Venn diagrams of differentially expressed  
733 genes following 30 min (A) and 4 h bortezomib treatments (B) in WT N2 and zip-1(jy13) mutant  
734 animals as compared to DMSO controls for each background. 64 and 888 genes were  
735 upregulated after 30 min and 4 h bortezomib treatment in N2 animals, respectively, but not in zip-  
736 1(jy13) mutants, suggesting that these genes are zip-1-dependent. (C) The list of zip-1-dependent  
737 genes shows significant overlap with previously published list of genes that are upregulated by  
738 different IPR triggers. A Fisher's exact test was used to calculate odds ratios and p-values. These  
739 values were calculated taking in account all genes in C. elegans genome. If the odds ratio is  
740 greater than one, two data sets are positively correlated. Jaccard index measures similarity  
741 between two sets, with the range 0-1 (0 – no similarity, 1 – same datasets). For approximate  
742 quantification, the odds ratio and Jaccard index color keys are indicated on the right side of the  
743 table. (D) Graphical representation of enriched gene categories for all zip-1-dependent genes at  
744 30 min and 4 h timepoints of bortezomib treatment. Each category represents a biological process  
745 or a structure associated with zip-1-dependent genes at either timepoint. Count of genes found in  
746 each category is indicated by the circle size, as illustrated under the table. Statistical significance



747 for each category is indicated by the circle color;  $p$ -values are indicated under the table. (E)  
748 Classification of 80 canonical IPR genes based on their ZIP-1 dependency. Representative  
749 canonical IPR genes from each class are shown in bold and underlined.

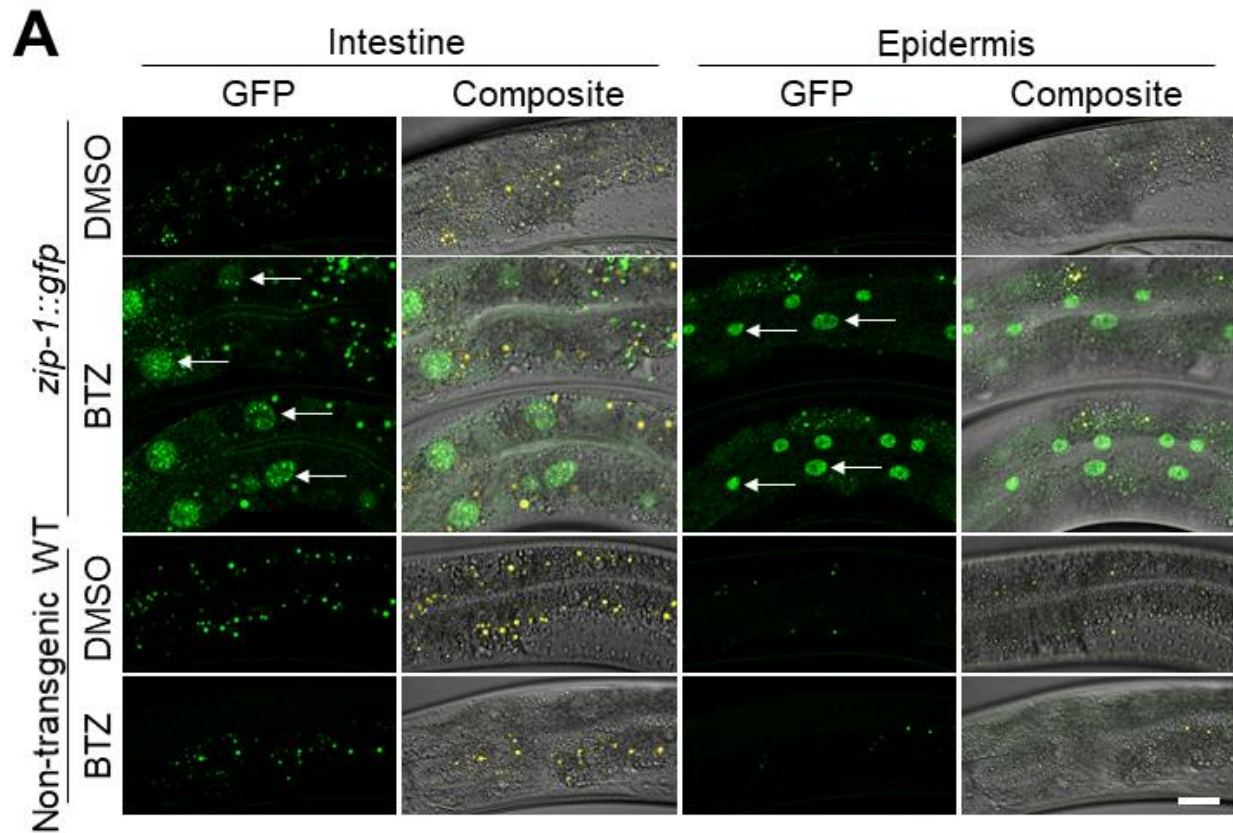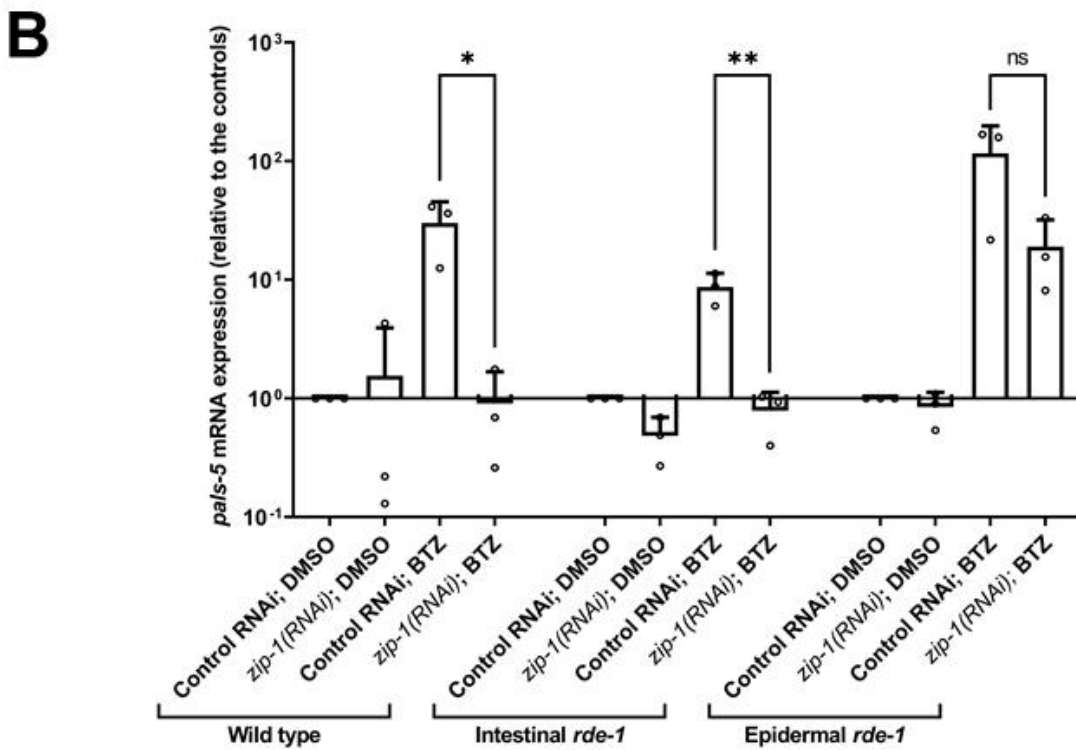

750

751 **Fig. 5. *zip-1* acts in the intestine to regulate *pals-5* mRNA levels.** (A) ZIP-1::GFP is expressed  
752 in intestinal and epidermal nuclei 4 h after bortezomib treatment. No expression was observed in  
753 animals exposed to DMSO control, or in the non-transgenic control strain N2. Composite images  
754 consist of merged fluorescent (GFP and autofluorescence) and DIC channels. Yellow signal in  
755 the composite images depicts autofluorescence from gut granules. Scale bar = 20  $\mu$ m. (B)  
756 Intestine-specific *zip-1(RNAi)* prevents *pals-5* mRNA induction. qRT-PCR measurements of *pals-*  
757 *5* levels at the 30 min timepoint of bortezomib (BTZ) or DMSO treatments. The results are shown  
758 as fold change in gene expression relative to DMSO diluent control. Three independent  
759 experimental replicates were analyzed; the values for each replicate are indicated with circles.  
760 Error bars represent standard deviations. A one-tailed t-test was used to calculate *p*-values; *p* <  
761 0.01 is indicated with two asterisks; *p*-values between 0.01 and 0.05 are indicated with a single  
762 asterisk; ns indicates nonsignificant difference (*p* > 0.05).

763

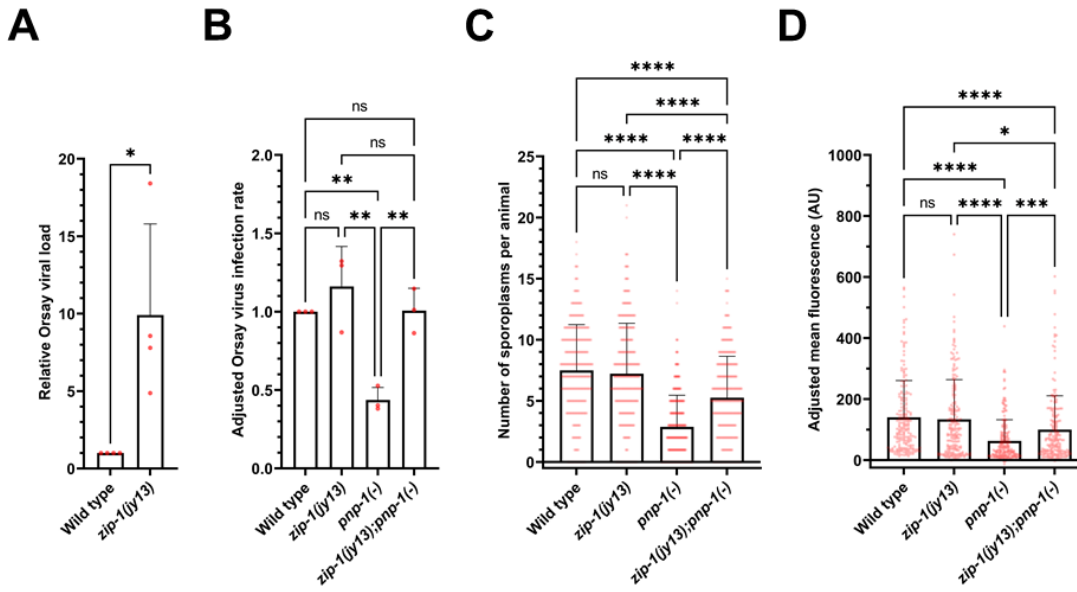

764

765 **Fig. 6. *zip-1* promotes resistance to intracellular pathogens.** (A) qRT-PCR analysis of Orsay  
766 virus RNA1 levels in control and *zip-1(jy13)* mutant animals. Animals were infected at L4 stage  
767 and collected at 24 hpi. Four experimental replicates were analyzed, each consisting of two  
768 biological replicates assayed in technical duplicates. (B) Fraction of animals infected with Orsay  
769 virus in control, *zip-1(jy13)*, *pnp-1(jy90)* and *zip-1(jy13); pnp-1(jy90)* backgrounds at 12 hpi.  
770 Animals were infected at L1 stage. 900 animals per strain were scored based on the presence or  
771 absence of the Orsay virus RNA1-specific FISH probe fluorescence. The infection rate of the  
772 control strain was set to one. (C) *N. parisii* pathogen load quantified at 3 hpi as number of  
773 sporoplasms per animal; 300 L1 animals were analyzed per strain in three experimental  
774 replicates. (D) Quantification of *N. parisii*-specific mean FISH fluorescence signal normalized to  
775 body area excluding pharynx. Animals were infected at L1 stage and analyzed at 30 hpi; 200  
776 animals were analyzed per strain. The head region was excluded from the analysis because of  
777 the expression of the red coinjection marker *myo-2p::mCherry*. In box-and-whisker plots, each  
778 box represents 50% of the data closest to the median value (line in the box), whereas whiskers  
779 span the values outside of the box. AU – arbitrary units. (A-D) All strains are in a *pals-5p::gfp*  
780 background. Statistical analyses were performed using an unpaired t-test (A), an ordinary one-  
781 way ANOVA (B) and a Kruskal-Wallis test (C, D) to calculate *p*-values; *p* < 0.0001 is indicated  
782 with four asterisks; *p* < 0.001 is indicated with three asterisks; *p* < 0.01 is indicated with two  
783 asterisks; *p*-values between 0.01 and 0.05 are indicated with a single asterisk; ns indicates  
784 nonsignificant difference (*p* > 0.05).

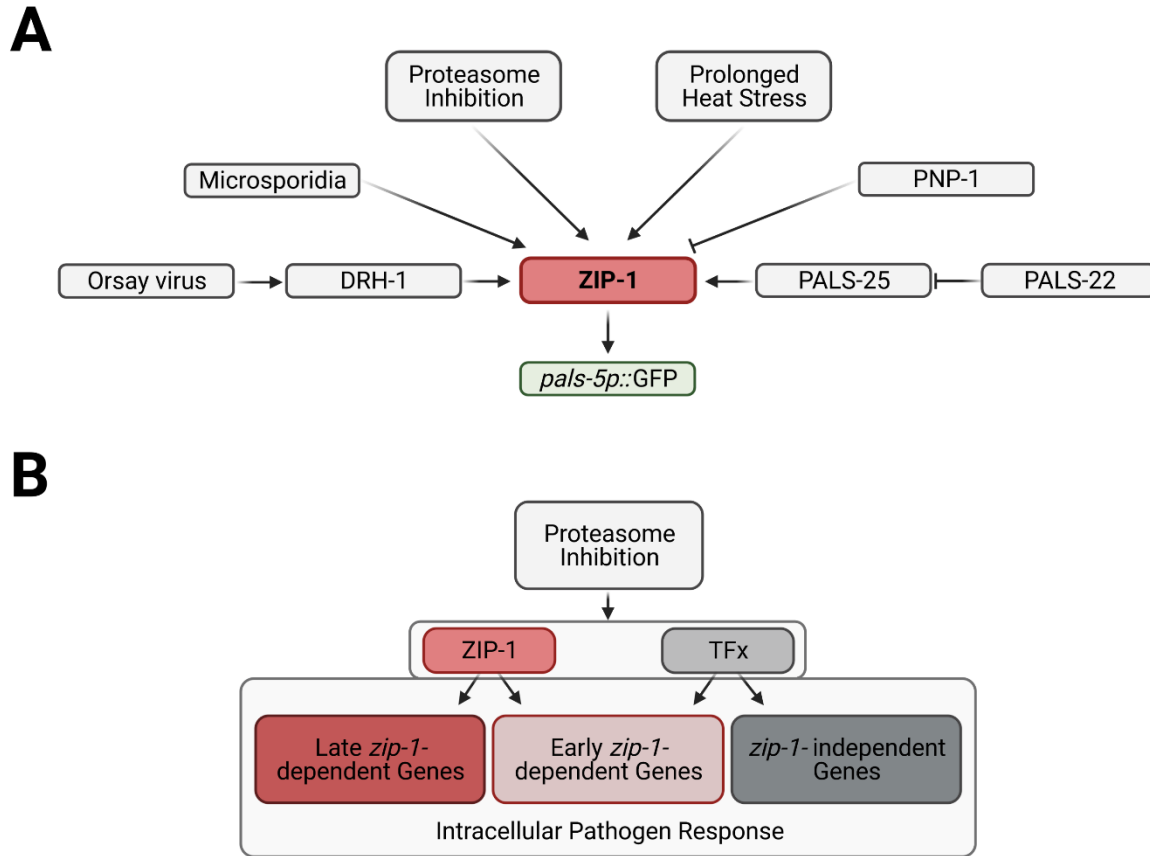

785

786 **Fig. 7. Model of IPR gene regulation.** (A) All known IPR activating pathways require ZIP-1 for  
787 induction of the *pals-5p::GFP* reporter. (B) IPR genes can be divided into three categories: early  
788 *zip-1*-dependent, late *zip-1*-dependent and *zip-1*-independent genes. Unknown transcription  
789 factor or factors (TFx) regulate expression of early *zip-1*-dependent genes at later timepoint, as  
790 well as transcription of *zip-1*-independent genes.

791

792 **Supplementary figures and supplementary figure legends**

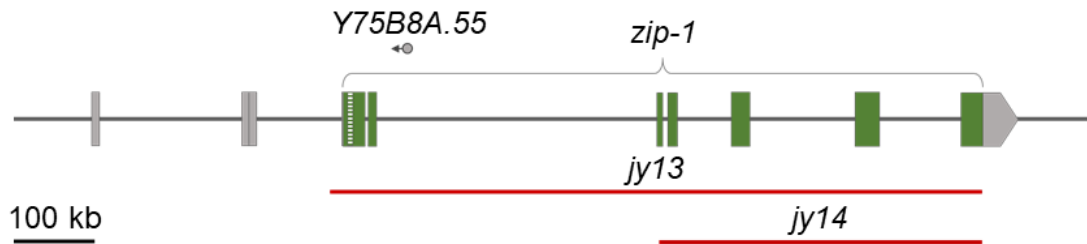

793

794 **Fig. S1. Graphic representation of the *zip-1* gene.** Green boxes indicate exons; the box with  
795 green stripes represents part of the gene that is spliced in some *zip-1* isoforms. Grey boxes  
796 represent 5' UTR regions annotated for different *zip-1* isoforms, as well as 3' UTR. Red lines  
797 indicate regions deleted in *jy13* and *jy14* alleles. *Y75B8A.55* non-coding RNA is indicated with a  
798 circle and an arrow.



**A**

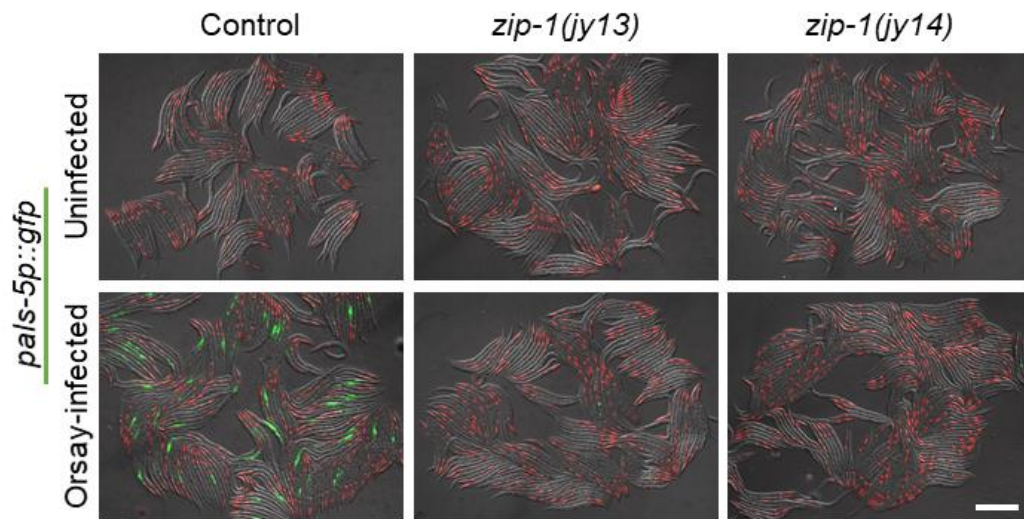

**B**

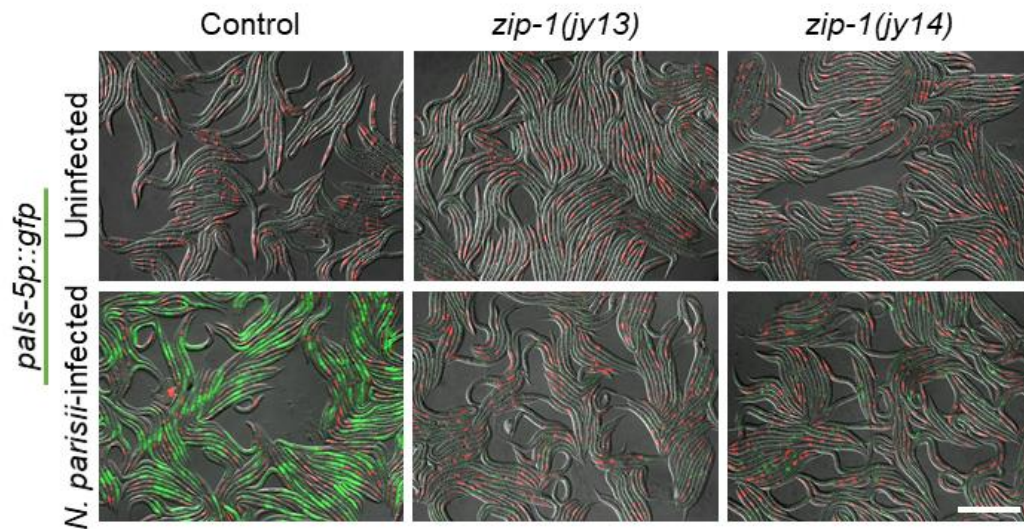

799

800 **Fig. S2. Induction of *pals-5p::GFP* expression is reduced in *zip-1(jy14)* mutants following**  
801 **intracellular infection with Orsay virus or *N. parisii*.** (A, B) Representative images of control  
802 (upper row) and Orsay virus (A) and *N. parisii* (B) infected animals (lower row). Fluorescent and  
803 DIC images were merged. Scale bar = 200  $\mu$ m.



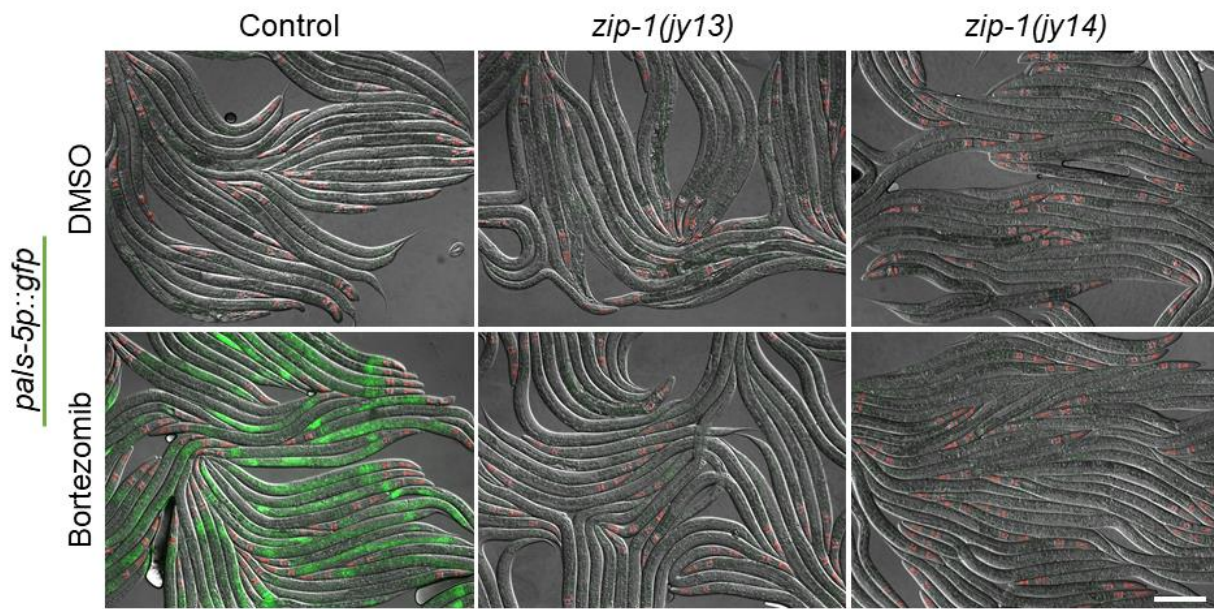

804

805 **Fig. S3. Proteasome inhibition by bortezomib does not induce *pals-5p::GFP* expression in**  
806 ***zip-1(jy14)* mutants.** Fluorescent and DIC images were merged. Scale bar = 200  $\mu$ m.

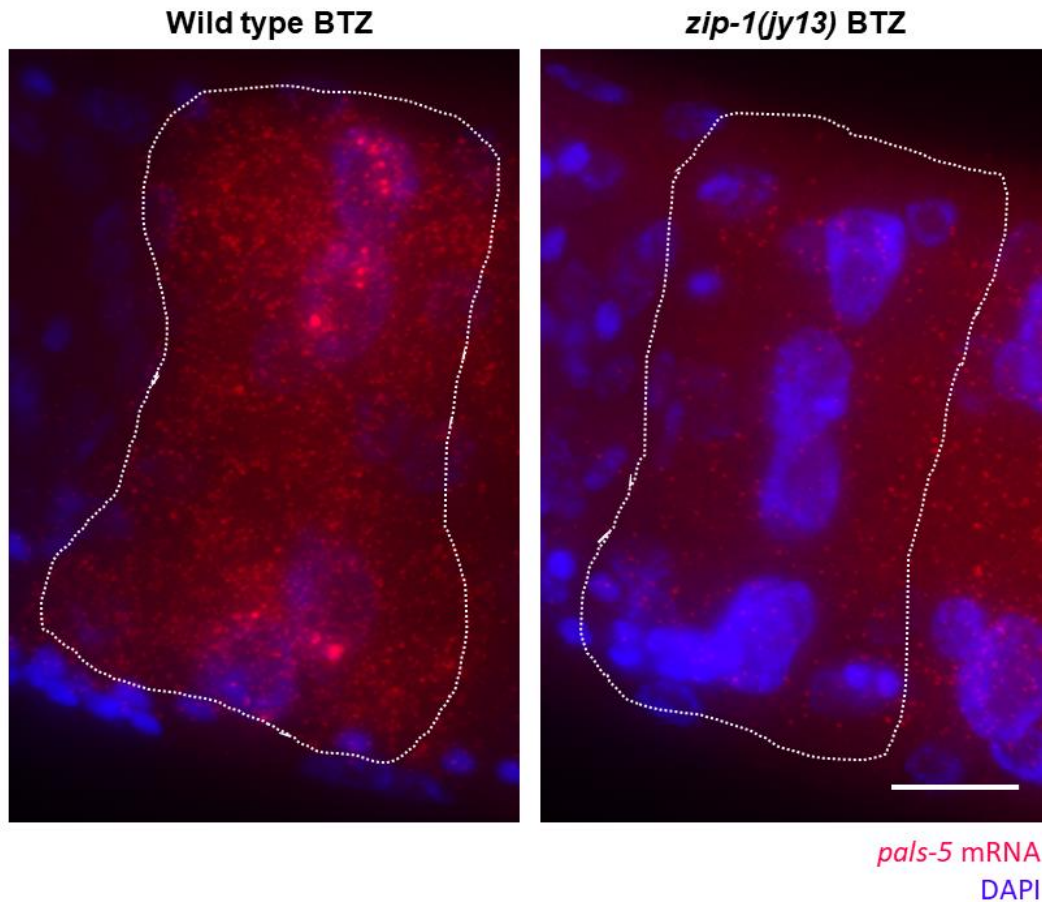

807

808 **Fig. S4. Representative images of the first four intestinal cells of bortezomib treated**  
809 **animals from smFISH analysis. *pals-5* mRNA is visualized with far-red fluorophore and nuclei**  
810 **are labeled with DAPI (blue). Images are maximal projections of z-stacks taken in far-red and blue**  
811 **channels. Dotted lines demarcate areas of the first four intestinal cells that were analyzed. Scale**  
812 **bar = 10  $\mu$ m.**

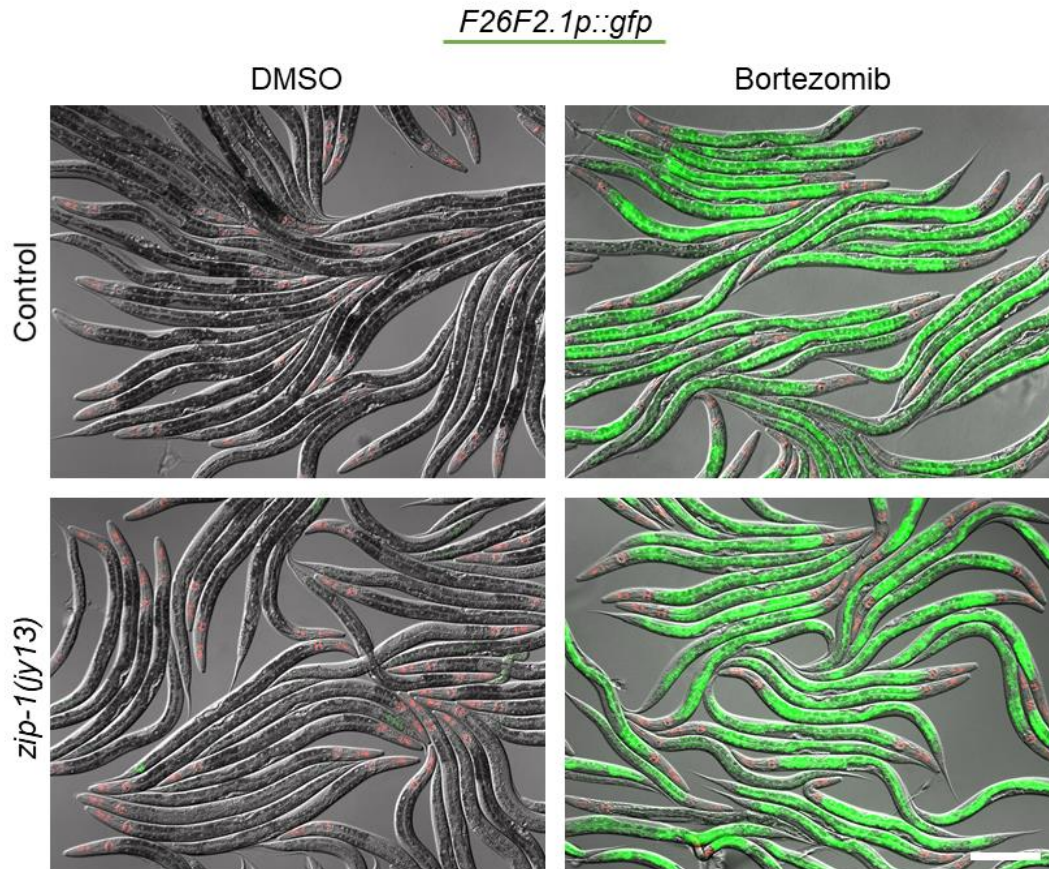

813

814 **Fig. S5. Proteasome inhibition by bortezomib induces *F26F2.1p::GFP* expression in a *zip-***  
815 ***1(jy13)* background.** Fluorescent and DIC images were merged. Scale bar = 200  $\mu$ m.

**A**

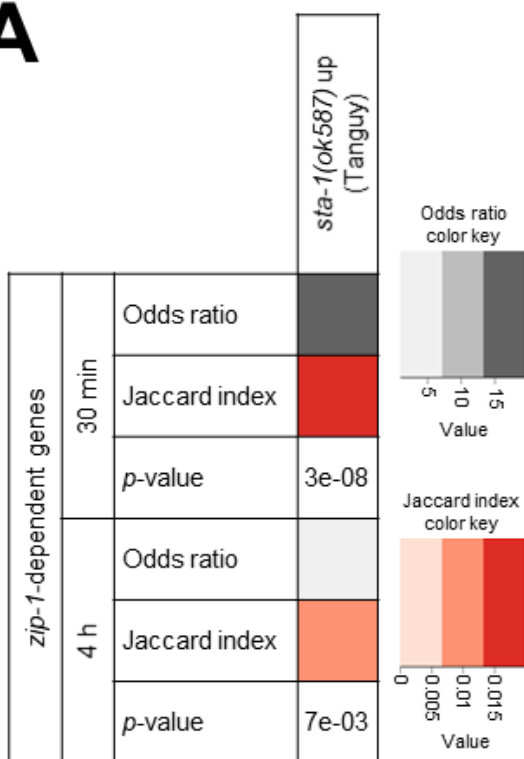

**C**

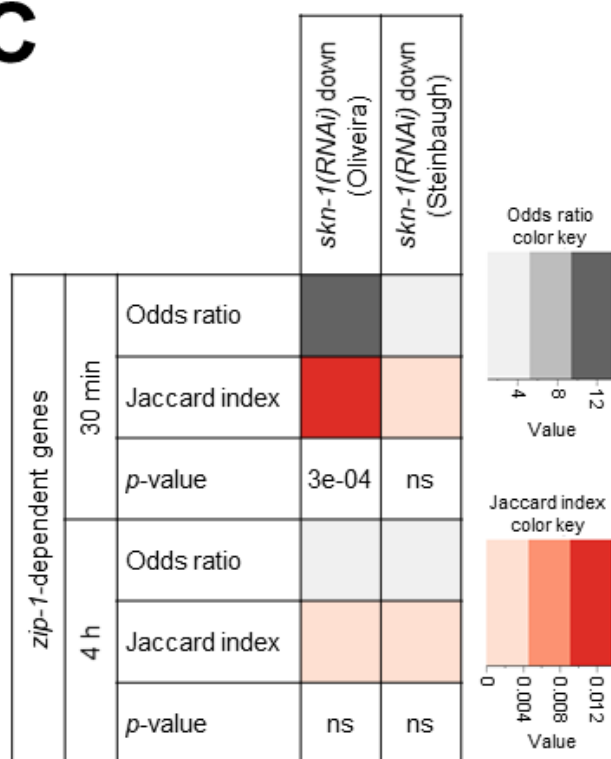

**B**

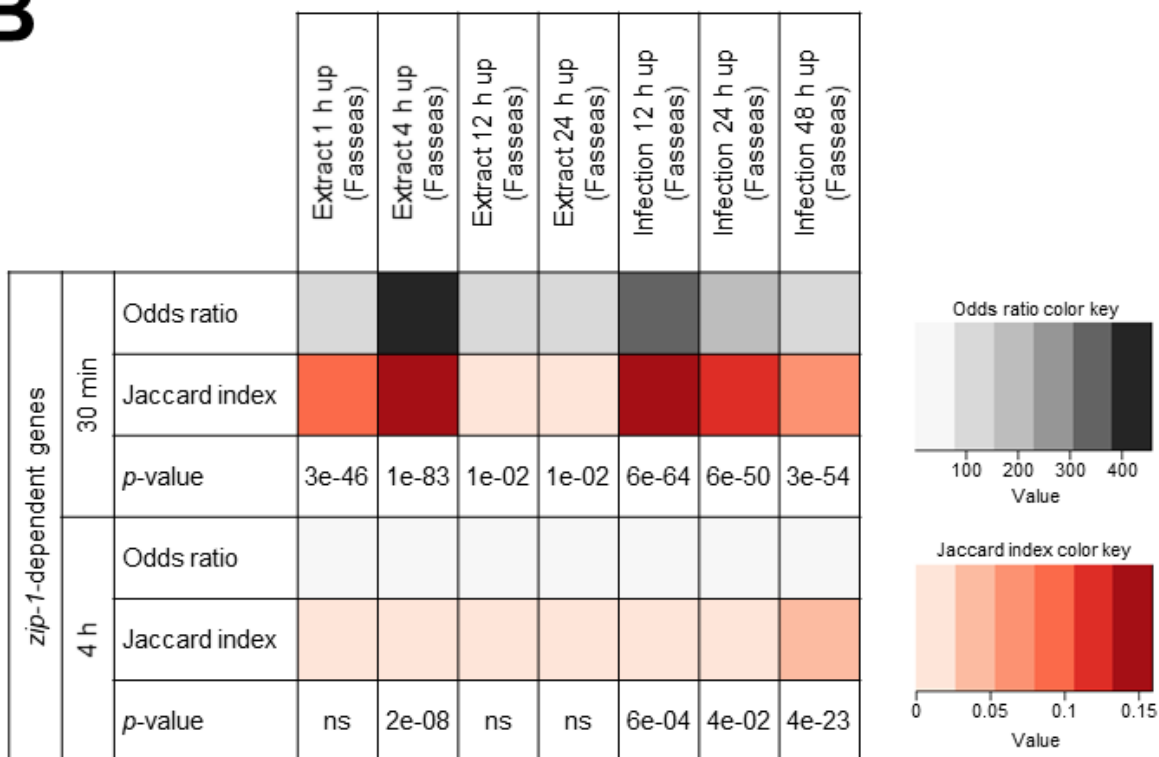

816



817 **Fig. S6. Correlation between *zip-1*-dependent genes and *sta-1*-regulated, ORR and *skn-1*-**  
818 **regulated genes.** (A-C) Statistical similarity between *zip-1*-dependent gene set and genes  
819 downregulated in *sta-1(ok587)* mutants (A), ORR genes (B) and genes upregulated following *skn-*  
820 *1* downregulation (C). Fisher's exact test was used to calculate odds ratios and *p*-values. If odds  
821 ratio is greater than one, two data sets are positively correlated. Jaccard index measures similarity  
822 between two sets, with the range 0-1 (0 – no similarity, 1 – same datasets). For approximate  
823 quantification, the odds ratio and Jaccard index color keys are indicated on the right side of each  
824 table.

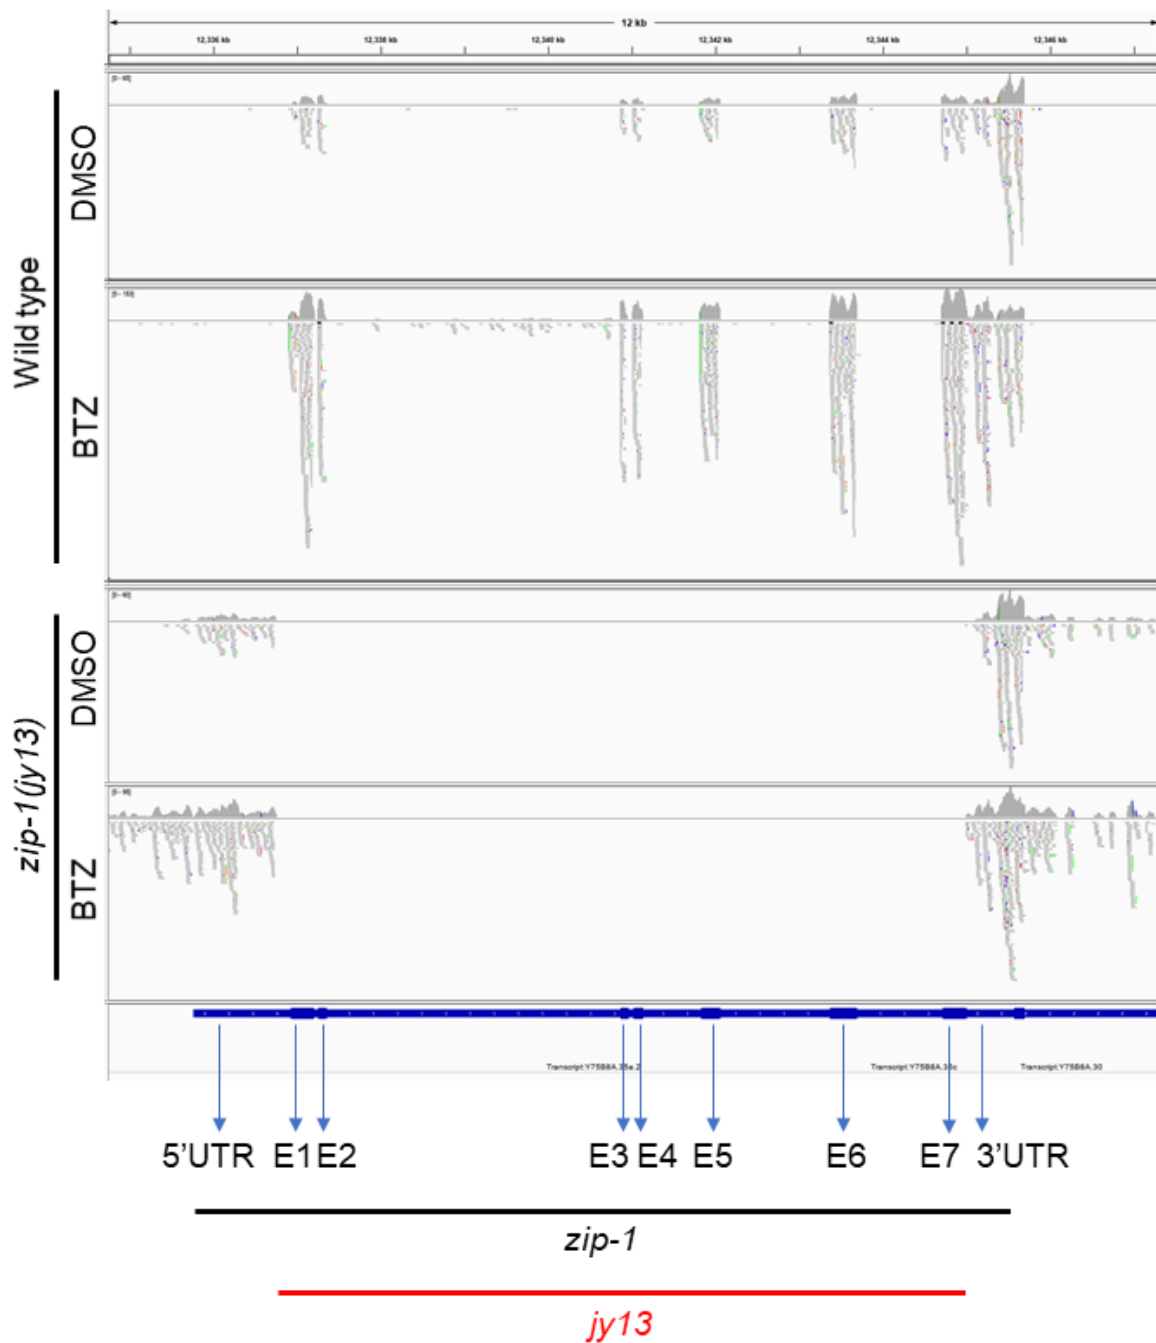

825

826 **Fig. S7. Alignment of mapped *zip-1* reads from RNA seq analysis.** Individual mapped reads  
827 and summary graphs are shown for DMSO and bortezomib treated wild-type N2 and *zip-1(jy13)*  
828 samples. Genomic location is indicated on the top of the graph. *zip-1* and *jy13* locations are  
829 indicated on the bottom. Exons of *zip-1* are labeled with E1-E7.



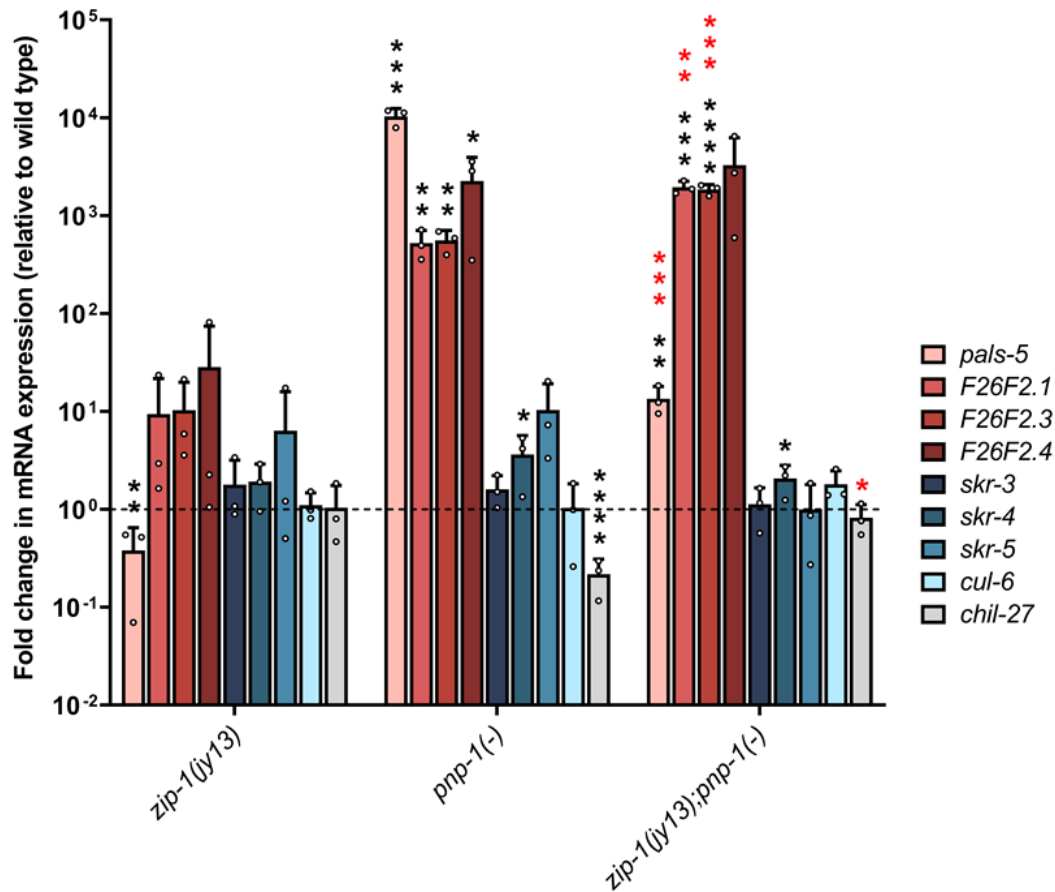

830

831 **Fig. S8. ZIP-1 regulates expression of some IPR genes that are upregulated in *pnp-1(jy90)***  
 832 **mutants.** qRT-PCR measurements of selected IPR genes and *chil-27* following DMSO and  
 833 bortezomib treatments. The results are shown as the fold change in gene expression relative to  
 834 control strain treated with DMSO. All strains in *jyIs8[pals-5p::gfp]* strain background. Three  
 835 independent experimental replicates were analyzed, the values for each replicate are indicated  
 836 with circles. Error bars represent standard deviations. A one-tailed t-test was used to calculate *p*-  
 837 values; black asterisks represent significant difference between the labeled sample and the wild-  
 838 type DMSO control; red asterisks represent significant difference between *pnp-1(jy90)* and *zip-*  
 839 *1(jy13); pnp-1(jy90)* backgrounds; *p* < 0.0001 is indicated with four asterisks; *p* < 0.001 is indicated  
 840 with three asterisks; *p* < 0.01 is indicated with two asterisks; *p*-values between 0.01 and 0.05 are  
 841 indicated with a single asterisk; *p*-values higher than 0.05 are not labeled.

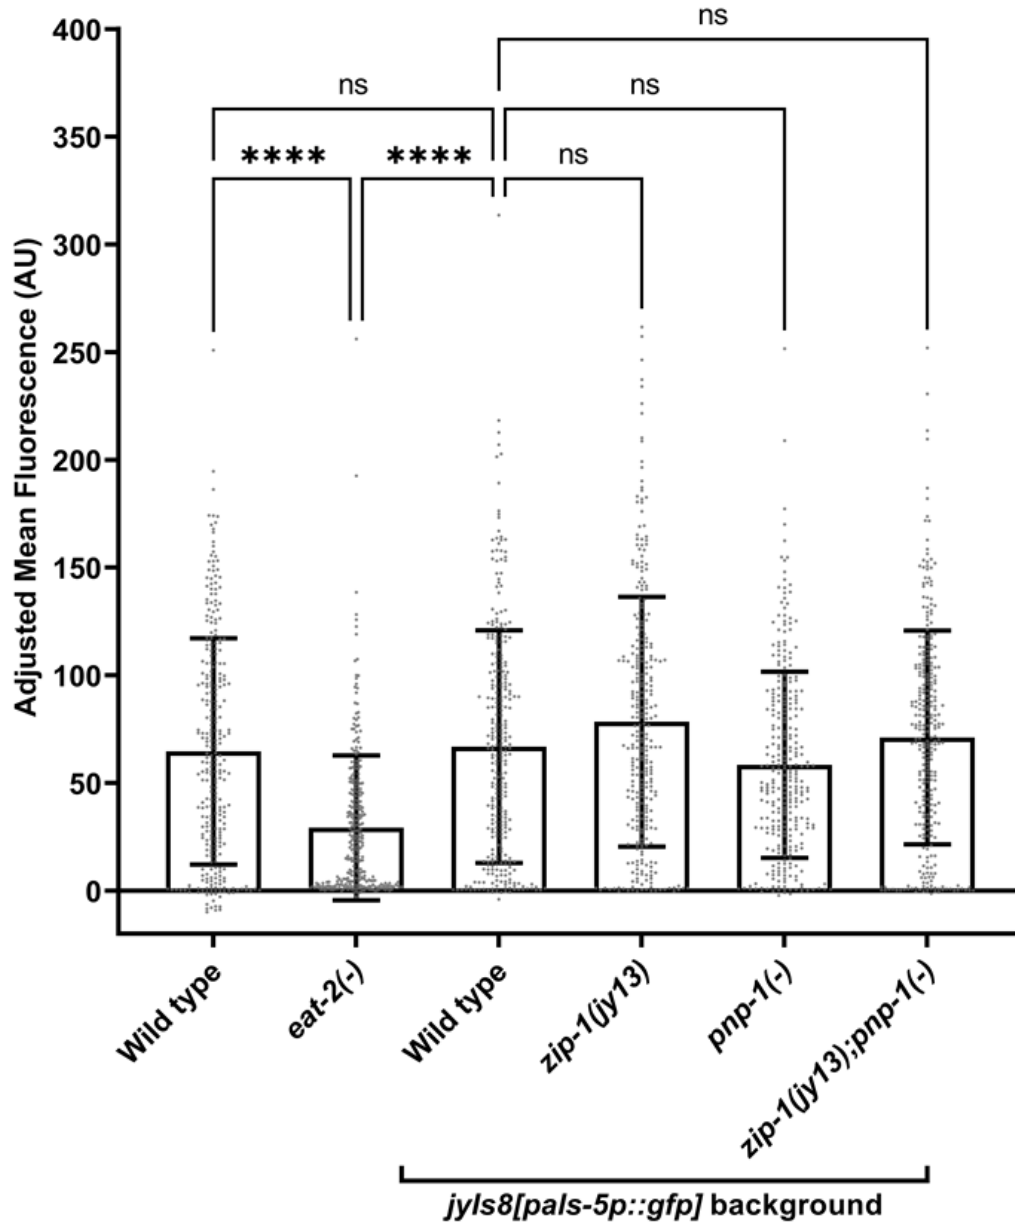

842

843 **Fig. S9. *zip-1(jy13)* and *pnp-1(jy90)* single and double mutants have similar accumulation**  
844 **of fluorescent beads.** Quantification of fluorescent bead accumulation in the control strains, *zip-*  
845 *1(jy13); jyIs8*, *pnp-1(jy90); jyIs8* and *zip-1(jy13); pnp-1(jy90); jyIs8* mutants. Mean fluorescence  
846 was measured in 150 animals per genotype; background fluorescence was subtracted. In the  
847 box-and-whisker plot, each box represents 50% of the data closest to the median value (line in  
848 the box). Whiskers span the values outside of the box. AU – arbitrary units. A Kruskal-Wallis test  
849 was used to calculate *p*-values; *p* < 0.0001 is indicated with four asterisks; ns indicates  
850 nonsignificant difference (*p* > 0.05).

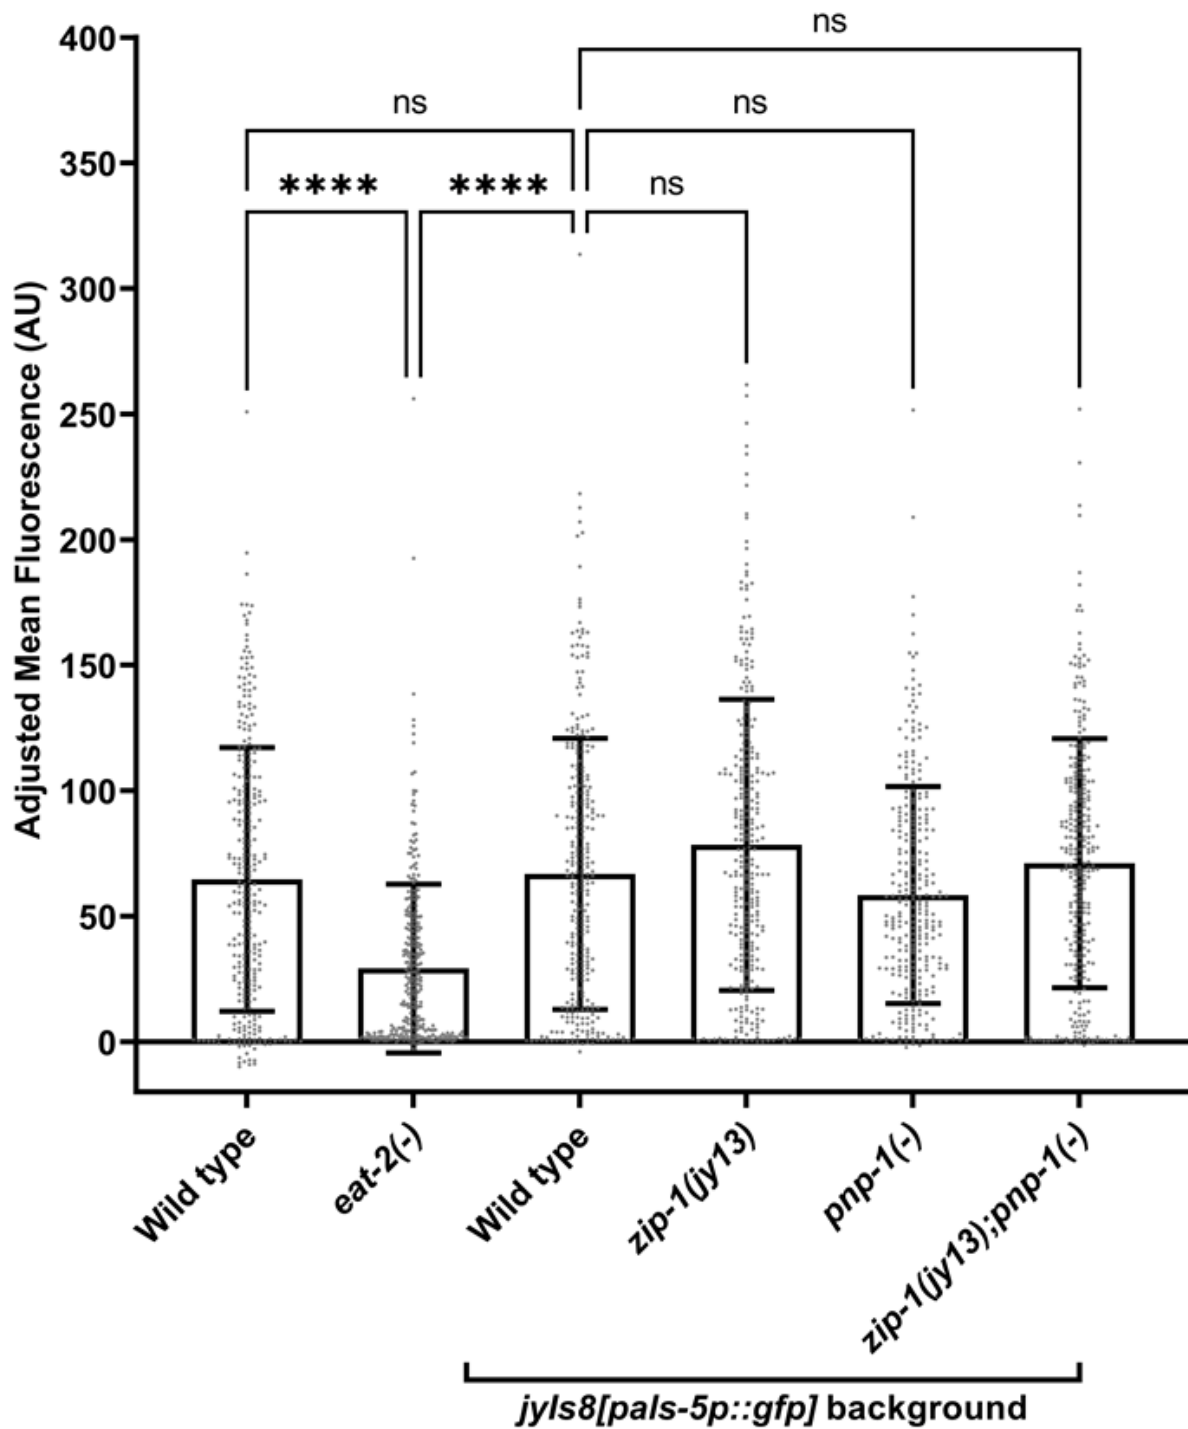

851

852 **Fig. S10. Increased sensitivity to heat shock and smaller size phenotypes of *pnp-1(jy90)***  
853 **mutants do not depend on *zip-1*.** (A) Graphical representation of survival after heat shock. Nine  
854 biological replicates from three experiments are indicated with circles; 30 animals were analyzed  
855 in each replicate. (B) Graphical representation of body length measurements after 44 h incubation

856 at 20°C. 150 animals were analyzed, 50 animals per each of three replicates. (A, B) The box-and-  
857 whisker plots were used for data representation. Each box represents 50% of the data closest to  
858 the median value (line in the box). Whiskers span the values outside of the box. All strains in  
859 *jyIs8[pals-5p::gfp]* strain background. A Kruskal-Wallis test was used to calculate  $p$ -values;  $p <$   
860 0.0001 is indicated with four asterisks;  $p < 0.01$  is indicated with two asterisks;  $p$ -values between  
861 0.01 and 0.05 are indicated with a single asterisk;  $p$ -values higher than 0.05 are not labeled.

862

863 **Supplementary table legends**

864 **Table S1. Results of RNAi screens.** The expression of PALS-5::GFP reporter was analyzed in  
865 *pals-22(jy3)* mutant background. Expression of *pals-5p::GFP* reporter was analyzed in animals  
866 exposed to prolonged heat stress. The values of GFP intensity were normalized to the length of  
867 worms (TOF). Average values are given for RNAi clones that were tested more than once.

868 **Table S2. An overview of differentially expressed genes in animals treated with bortezomib  
869 and DMSO.** Differentially expressed genes with adjusted  $p$ -value lower than 0.05 are listed for  
870 wild-type (N2) animals and *zip-1(jy13)* mutants.

871 **Table S3. Comparisons of differentially expressed genes from different datasets.**  
872 Differentially expressed genes from previously published datasets and their overlap with *zip-1*-  
873 dependent genes are shown.

874 **Table S4. Wormcat analysis results.** Overrepresented categories are listed for both analyzed  
875 time points. All catalog values represent number of genes in a specific category in the whole  
876 annotation list. Bonferroni values represent corrected  $p$ -values (Bonferroni correction).

877 **Table S5. List of worm strains used in this study.** Names of strains and their genotypes are  
878 listed.

879 **Table S6. List of primers used in this study.** Primer labels, descriptions and sequences are  
880 listed.

881 **Table S7. RNA-seq statistics.** Numbers of total and mapped reads are given for each sample  
882 and each replicate. R1, R2 and R3 represent replicate 1, 2 and 3 respectively.

883

884 **Acknowledgements**

885 This work was supported by NIH under R01 AG052622 and GM114139 to ERT, NIGMS/NIH  
886 award K12GM068524 to SSG and the American Heart Association postdoctoral award  
887 19POST34460023 to VL. We thank Damian Ekiert, Crystal Chhan, Eillen Tecle, and Cheng-Ju  
888 Kuo for helpful comments on the manuscript. We thank Eillen Tecle for crossing strains to create  
889 *zip-1(jy13);pnp-1;jyls8* double mutant and for performing preliminary analyses on these animals.  
890 We thank Damian Ekiert for his help with PALS-5 protein synthesis. We thank Yishi Jin and Rose  
891 Malinow for providing reagents. RNA-seq data were generated at the UC San Diego IGM  
892 Genomics Center utilizing an Illumina NovaSeq 6000 that was purchased with funding from a  
893 National Institutes of Health SIG grant (#S10 OD026929). The models in Fig. 7 were created  
894 using BioRender.com.

895



## 896 References

- 897 1. Kasuga Y, Zhu B, Jang KJ, Yoo JS. Innate immune sensing of coronavirus and viral  
898 evasion strategies. *Exp Mol Med*. 2021;53(5):723-36.
- 899 2. Rehwinkel J, Gack MU. RIG-I-like receptors: their regulation and roles in RNA sensing.  
900 *Nat Rev Immunol*. 2020;20(9):537-51.
- 901 3. Yamada T, Sato S, Sotoyama Y, Orba Y, Sawa H, Yamauchi H, et al. RIG-I triggers a  
902 signaling-abortive anti-SARS-CoV-2 defense in human lung cells. *Nat Immunol*. 2021.
- 903 4. Yin X, Riva L, Pu Y, Martin-Sancho L, Kanamune J, Yamamoto Y, et al. MDA5 Governs  
904 the Innate Immune Response to SARS-CoV-2 in Lung Epithelial Cells. *Cell Rep*.  
905 2021;34(2):108628.
- 906 5. Lowery SA, Sariol A, Perlman S. Innate immune and inflammatory responses to SARS-  
907 CoV-2: Implications for COVID-19. *Cell Host Microbe*. 2021.
- 908 6. Felix MA, Ashe A, Piffaretti J, Wu G, Nuez I, Belicard T, et al. Natural and experimental  
909 infection of *Caenorhabditis* nematodes by novel viruses related to nodaviruses. *PLoS Biol*.  
910 2011;9(1):e1000586.
- 911 7. Ashe A, Belicard T, Le Pen J, Sarkies P, Frezal L, Lehrbach NJ, et al. A deletion  
912 polymorphism in the *Caenorhabditis elegans* RIG-I homolog disables viral RNA dicing and  
913 antiviral immunity. *Elife*. 2013;2:e00994.
- 914 8. Gammon DB, Ishidate T, Li L, Gu W, Silverman N, Mello CC. The Antiviral RNA  
915 Interference Response Provides Resistance to Lethal Arbovirus Infection and Vertical  
916 Transmission in *Caenorhabditis elegans*. *Curr Biol*. 2017;27(6):795-806.
- 917 9. Guo X, Zhang R, Wang J, Ding SW, Lu R. Homologous RIG-I-like helicase proteins direct  
918 RNAi-mediated antiviral immunity in *C. elegans* by distinct mechanisms. *Proc Natl Acad Sci U S*  
919 *A*. 2013;110(40):16085-90.
- 920 10. Sowa JN, Jiang H, Somasundaram L, Tecle E, Xu G, Wang D, et al. The *Caenorhabditis*  
921 *elegans* RIG-I Homolog DRH-1 Mediates the Intracellular Pathogen Response upon Viral  
922 Infection. *J Virol*. 2020;94(2).
- 923 11. Bakowski MA, Desjardins CA, Smelkinson MG, Dunbar TL, Lopez-Moyado IF, Rifkin SA,  
924 et al. Ubiquitin-mediated response to microsporidia and virus infection in *C. elegans*. *PLoS*  
925 *Pathog*. 2014;10(6):e1004200.
- 926 12. Reddy KC, Dror T, Sowa JN, Panek J, Chen K, Lim ES, et al. An Intracellular Pathogen  
927 Response Pathway Promotes Proteostasis in *C. elegans*. *Curr Biol*. 2017;27(22):3544-53 e5.
- 928 13. Reddy KC, Dror T, Underwood RS, Osman GA, Elder CR, Desjardins CA, et al.  
929 Antagonistic paralogs control a switch between growth and pathogen resistance in *C. elegans*.  
930 *PLoS Pathog*. 2019;15(1):e1007528.
- 931 14. Irazoqui JE, Urbach JM, Ausubel FM. Evolution of host innate defence: insights from  
932 *Caenorhabditis elegans* and primitive invertebrates. *Nat Rev Immunol*. 2010;10(1):47-58.
- 933 15. Tecle E, Chhan CB, Franklin L, Underwood RS, Hanna-Rose W, Troemel ER. The purine  
934 nucleoside phosphorylase *pnp-1* regulates epithelial cell resistance to infection in *C. elegans*.  
935 *PLoS Pathog*. 2021;17(4):e1009350.
- 936 16. Leyva-Diaz E, Stefanakis N, Carrera I, Glenwinkel L, Wang G, Driscoll M, et al. Silencing  
937 of Repetitive DNA Is Controlled by a Member of an Unusual *Caenorhabditis elegans* Gene Family.  
938 *Genetics*. 2017;207(2):529-45.
- 939 17. Lazetic V, Troemel ER. Conservation lost: host-pathogen battles drive diversification and  
940 expansion of gene families. *FEBS J*. 2020.
- 941 18. Panek J, Gang SS, Reddy KC, Luallen RJ, Fulzele A, Bennett EJ, et al. A cullin-RING  
942 ubiquitin ligase promotes thermotolerance as part of the intracellular pathogen response in  
943 *Caenorhabditis elegans*. *Proc Natl Acad Sci U S A*. 2020;117(14):7950-60.
- 944 19. Sfaric I, Bui T, Daniels EC, Troemel ER. Nanoluciferase-Based Method for Detecting  
945 Gene Expression in *Caenorhabditis elegans*. *Genetics*. 2019;213(4):1197-207.

- 946 20. Osman GA, Fasseas MK, Koneru SL, Essmann CL, Kyrou K, Srinivasan MA, et al. Natural  
947 Infection of *C. elegans* by an Oomycete Reveals a New Pathogen-Specific Immune Response.  
948 *Curr Biol.* 2018;28(4):640-8 e5.
- 949 21. Fasseas MK, Grover M, Drury F, Essmann CL, Kaulich E, Schafer WR, et al.  
950 Chemosensory Neurons Modulate the Response to Oomycete Recognition in *Caenorhabditis*  
951 *elegans*. *Cell Rep.* 2021;34(2):108604.
- 952 22. Oliveira RP, Porter Abate J, Dilks K, Landis J, Ashraf J, Murphy CT, et al. Condition-  
953 adapted stress and longevity gene regulation by *Caenorhabditis elegans* SKN-1/Nrf. *Aging Cell.*  
954 2009;8(5):524-41.
- 955 23. Holdorf AD, Higgins DP, Hart AC, Boag PR, Pazour GJ, Walhout AJM, et al. WormCat:  
956 An Online Tool for Annotation and Visualization of *Caenorhabditis elegans* Genome-Scale Data.  
957 *Genetics.* 2020;214(2):279-94.
- 958 24. Segrist E, Cherry S. Using Diverse Model Systems to Define Intestinal Epithelial Defenses  
959 to Enteric Viral Infections. *Cell Host Microbe.* 2020;27(3):329-44.
- 960 25. Felix MA, Wang D. Natural Viruses of *Caenorhabditis* Nematodes. *Annu Rev Genet.*  
961 2019;53:313-26.
- 962 26. Buchon N, Silverman N, Cherry S. Immunity in *Drosophila melanogaster*--from microbial  
963 recognition to whole-organism physiology. *Nat Rev Immunol.* 2014;14(12):796-810.
- 964 27. Tanguy M, Veron L, Stempor P, Ahringer J, Sarkies P, Miska EA. An Alternative STAT  
965 Signaling Pathway Acts in Viral Immunity in *Caenorhabditis elegans*. *mBio.* 2017;8(5).
- 966 28. Reinke AW, Baek J, Ashenberg O, Keating AE. Networks of bZIP protein-protein  
967 interactions diversified over a billion years of evolution. *Science.* 2013;340(6133):730-4.
- 968 29. Hoeven R, McCallum KC, Cruz MR, Garsin DA. Ce-Duox1/BLI-3 generated reactive  
969 oxygen species trigger protective SKN-1 activity via p38 MAPK signaling during infection in *C.*  
970 *elegans*. *PLoS Pathog.* 2011;7(12):e1002453.
- 971 30. Shivers RP, Pagano DJ, Kooistra T, Richardson CE, Reddy KC, Whitney JK, et al.  
972 Phosphorylation of the conserved transcription factor ATF-7 by PMK-1 p38 MAPK regulates  
973 innate immunity in *Caenorhabditis elegans*. *PLoS Genet.* 2010;6(4):e1000892.
- 974 31. Reddy KC, Dunbar TL, Nargund AM, Haynes CM, Troemel ER. The *C. elegans* CCAAT-  
975 Enhancer-Binding Protein Gamma Is Required for Surveillance Immunity. *Cell Rep.*  
976 2016;14(7):1581-9.
- 977 32. Dunbar TL, Yan Z, Balla KM, Smelkinson MG, Troemel ER. *C. elegans* detects pathogen-  
978 induced translational inhibition to activate immune signaling. *Cell Host Microbe.* 2012;11(4):375-  
979 86.
- 980 33. Estes KA, Dunbar TL, Powell JR, Ausubel FM, Troemel ER. bZIP transcription factor zip-  
981 2 mediates an early response to *Pseudomonas aeruginosa* infection in *Caenorhabditis elegans*.  
982 *Proc Natl Acad Sci U S A.* 2010;107(5):2153-8.
- 983 34. McEwan DL, Kirienko NV, Ausubel FM. Host translational inhibition by *Pseudomonas*  
984 *aeruginosa* Exotoxin A Triggers an immune response in *Caenorhabditis elegans*. *Cell Host*  
985 *Microbe.* 2012;11(4):364-74.
- 986 35. Tjahjono E, Kirienko NV. A conserved mitochondrial surveillance pathway is required for  
987 defense against *Pseudomonas aeruginosa*. *PLoS Genet.* 2017;13(6):e1006876.
- 988 36. Deng P, Uma Naresh N, Du Y, Lamech LT, Yu J, Zhu LJ, et al. Mitochondrial UPR  
989 repression during *Pseudomonas aeruginosa* infection requires the bZIP protein ZIP-3. *Proc Natl*  
990 *Acad Sci U S A.* 2019;116(13):6146-51.
- 991 37. Pellegrino MW, Nargund AM, Kirienko NV, Gillis R, Fiorese CJ, Haynes CM. Mitochondrial  
992 UPR-regulated innate immunity provides resistance to pathogen infection. *Nature.*  
993 2014;516(7531):414-7.
- 994 38. Dasgupta M, Shashikanth M, Gupta A, Sandhu A, De A, Javed S, et al. NHR-49  
995 Transcription Factor Regulates Immunometabolic Response and Survival of *Caenorhabditis*  
996 *elegans* during *Enterococcus faecalis* Infection. *Infect Immun.* 2020;88(8).

- 997 39. Singh V, Aballay A. Heat-shock transcription factor (HSF)-1 pathway required for  
998 *Caenorhabditis elegans* immunity. *Proc Natl Acad Sci U S A*. 2006;103(35):13092-7.
- 999 40. Singh V, Aballay A. Regulation of DAF-16-mediated Innate Immunity in *Caenorhabditis*  
1000 *elegans*. *J Biol Chem*. 2009;284(51):35580-7.
- 1001 41. Visvikis O, Ihuegbu N, Labe SA, Luhachack LG, Alves AF, Wollenberg AC, et al. Innate  
1002 host defense requires TFEB-mediated transcription of cytoprotective and antimicrobial genes.  
1003 *Immunity*. 2014;40(6):896-909.
- 1004 42. Yang W, Dierking K, Rosenstiel PC, Schulenburg H. GATA transcription factor as a likely  
1005 key regulator of the *Caenorhabditis elegans* innate immune response against gut pathogens.  
1006 *Zoology (Jena)*. 2016;119(4):244-53.
- 1007 43. Shapira M, Hamlin BJ, Rong J, Chen K, Ronen M, Tan MW. A conserved role for a GATA  
1008 transcription factor in regulating epithelial innate immune responses. *Proc Natl Acad Sci U S A*.  
1009 2006;103(38):14086-91.
- 1010 44. Botts MR, Cohen LB, Probert CS, Wu F, Troemel ER. Microsporidia Intracellular  
1011 Development Relies on Myc Interaction Network Transcription Factors in the Host. *G3*  
1012 (Bethesda). 2016;6(9):2707-16.
- 1013 45. Troha K, Im JH, Revah J, Lazzaro BP, Buchon N. Comparative transcriptomics reveals  
1014 CrebA as a novel regulator of infection tolerance in *D. melanogaster*. *PLoS Pathog*.  
1015 2018;14(2):e1006847.
- 1016 46. Myllymaki H, Ramet M. JAK/STAT pathway in *Drosophila* immunity. *Scand J Immunol*.  
1017 2014;79(6):377-85.
- 1018 47. Xu J, Cherry S. Viruses and antiviral immunity in *Drosophila*. *Dev Comp Immunol*.  
1019 2014;42(1):67-84.
- 1020 48. Hedengren-Olcott M, Olcott MC, Mooney DT, Ekengren S, Geller BL, Taylor BJ.  
1021 Differential activation of the NF-kappaB-like factors Relish and Dif in *Drosophila melanogaster* by  
1022 fungi and Gram-positive bacteria. *J Biol Chem*. 2004;279(20):21121-7.
- 1023 49. Hedengren M, Asling B, Dushay MS, Ando I, Ekengren S, Wihlborg M, et al. Relish, a  
1024 central factor in the control of humoral but not cellular immunity in *Drosophila*. *Mol Cell*.  
1025 1999;4(5):827-37.
- 1026 50. Hayden MS, West AP, Ghosh S. NF-kappaB and the immune response. *Oncogene*.  
1027 2006;25(51):6758-80.
- 1028 51. Iwanaszko M, Kimmel M. NF-kappaB and IRF pathways: cross-regulation on target genes  
1029 promoter level. *BMC Genomics*. 2015;16:307.
- 1030 52. Mogensen TH. IRF and STAT Transcription Factors - From Basic Biology to Roles in  
1031 Infection, Protective Immunity, and Primary Immunodeficiencies. *Front Immunol*. 2018;9:3047.
- 1032 53. Zinatizadeh MR, Schock B, Chalbatani GM, Zarandi PK, Jalali SA, Miri SR. The Nuclear  
1033 Factor Kappa B (NF-kB) signaling in cancer development and immune diseases. *Genes Dis*.  
1034 2021;8(3):287-97.
- 1035 54. Galli G, Saleh M. Immunometabolism of Macrophages in Bacterial Infections. *Front Cell*  
1036 *Infect Microbiol*. 2020;10:607650.
- 1037 55. Gold KS, Bruckner K. Macrophages and cellular immunity in *Drosophila melanogaster*.  
1038 *Semin Immunol*. 2015;27(6):357-68.
- 1039 56. Pukkila-Worley R, Ausubel FM. Immune defense mechanisms in the *Caenorhabditis*  
1040 *elegans* intestinal epithelium. *Curr Opin Immunol*. 2012;24(1):3-9.
- 1041 57. Balla KM, Andersen EC, Kruglyak L, Troemel ER. A wild *C. elegans* strain has enhanced  
1042 epithelial immunity to a natural microsporidian parasite. *PLoS Pathog*. 2015;11(2):e1004583.
- 1043 58. Balla KM, Lazetic V, Troemel ER. Natural variation in the roles of *C. elegans* autophagy  
1044 components during microsporidia infection. *PLoS One*. 2019;14(4):e0216011.
- 1045 59. Emmons SW, Klass MR, Hirsh D. Analysis of the constancy of DNA sequences during  
1046 development and evolution of the nematode *Caenorhabditis elegans*. *Proc Natl Acad Sci U S A*.  
1047 1979;76(3):1333-7.

- 1048 60. Arribere JA, Bell RT, Fu BX, Artiles KL, Hartman PS, Fire AZ. Efficient marker-free  
1049 recovery of custom genetic modifications with CRISPR/Cas9 in *Caenorhabditis elegans*.  
1050 *Genetics*. 2014;198(3):837-46.
- 1051 61. Paix A, Folkmann A, Rasoloson D, Seydoux G. High Efficiency, Homology-Directed  
1052 Genome Editing in *Caenorhabditis elegans* Using CRISPR-Cas9 Ribonucleoprotein Complexes.  
1053 *Genetics*. 2015;201(1):47-54.
- 1054 62. Pfaffl MW. A new mathematical model for relative quantification in real-time RT-PCR.  
1055 *Nucleic Acids Res*. 2001;29(9):e45.
- 1056 63. Robinson JT, Thorvaldsdottir H, Winckler W, Guttman M, Lander ES, Getz G, et al.  
1057 Integrative genomics viewer. *Nat Biotechnol*. 2011;29(1):24-6.
- 1058 64. Sarkies P, Ashe A, Le Pen J, McKie MA, Miska EA. Competition between virus-derived  
1059 and endogenous small RNAs regulates gene expression in *Caenorhabditis elegans*. *Genome*  
1060 *Res*. 2013;23(8):1258-70.
- 1061 65. Chen K, Franz CJ, Jiang H, Jiang Y, Wang D. An evolutionarily conserved transcriptional  
1062 response to viral infection in *Caenorhabditis nematodes*. *BMC Genomics*. 2017;18(1):303.
- 1063 66. Steinbaugh MJ, Narasimhan SD, Robida-Stubbs S, Moronetti Mazzeo LE, Dreyfuss JM,  
1064 Hourihan JM, et al. Lipid-mediated regulation of SKN-1/Nrf in response to germ cell absence.  
1065 *Elife*. 2015;4.
- 1066 67. Dokshin GA, Ghanta KS, Piscopo KM, Mello CC. Robust Genome Editing with Short  
1067 Single-Stranded and Long, Partially Single-Stranded DNA Donors in *Caenorhabditis elegans*.  
1068 *Genetics*. 2018;210(3):781-7.

1069
